# Supplementary material for: The collaboratively selective uranyl adsorption of marine fungal modification biosorbent linked by the open-chain polyether terminal with amidoxime
Source: publisher site journal article supplement (doi:10.1515/ract-2024-0296), 2024-08-08
Supplement: Supplementary file 2 [file j_ract-2024-0296_suppl_001.docx]

Supplementary Information


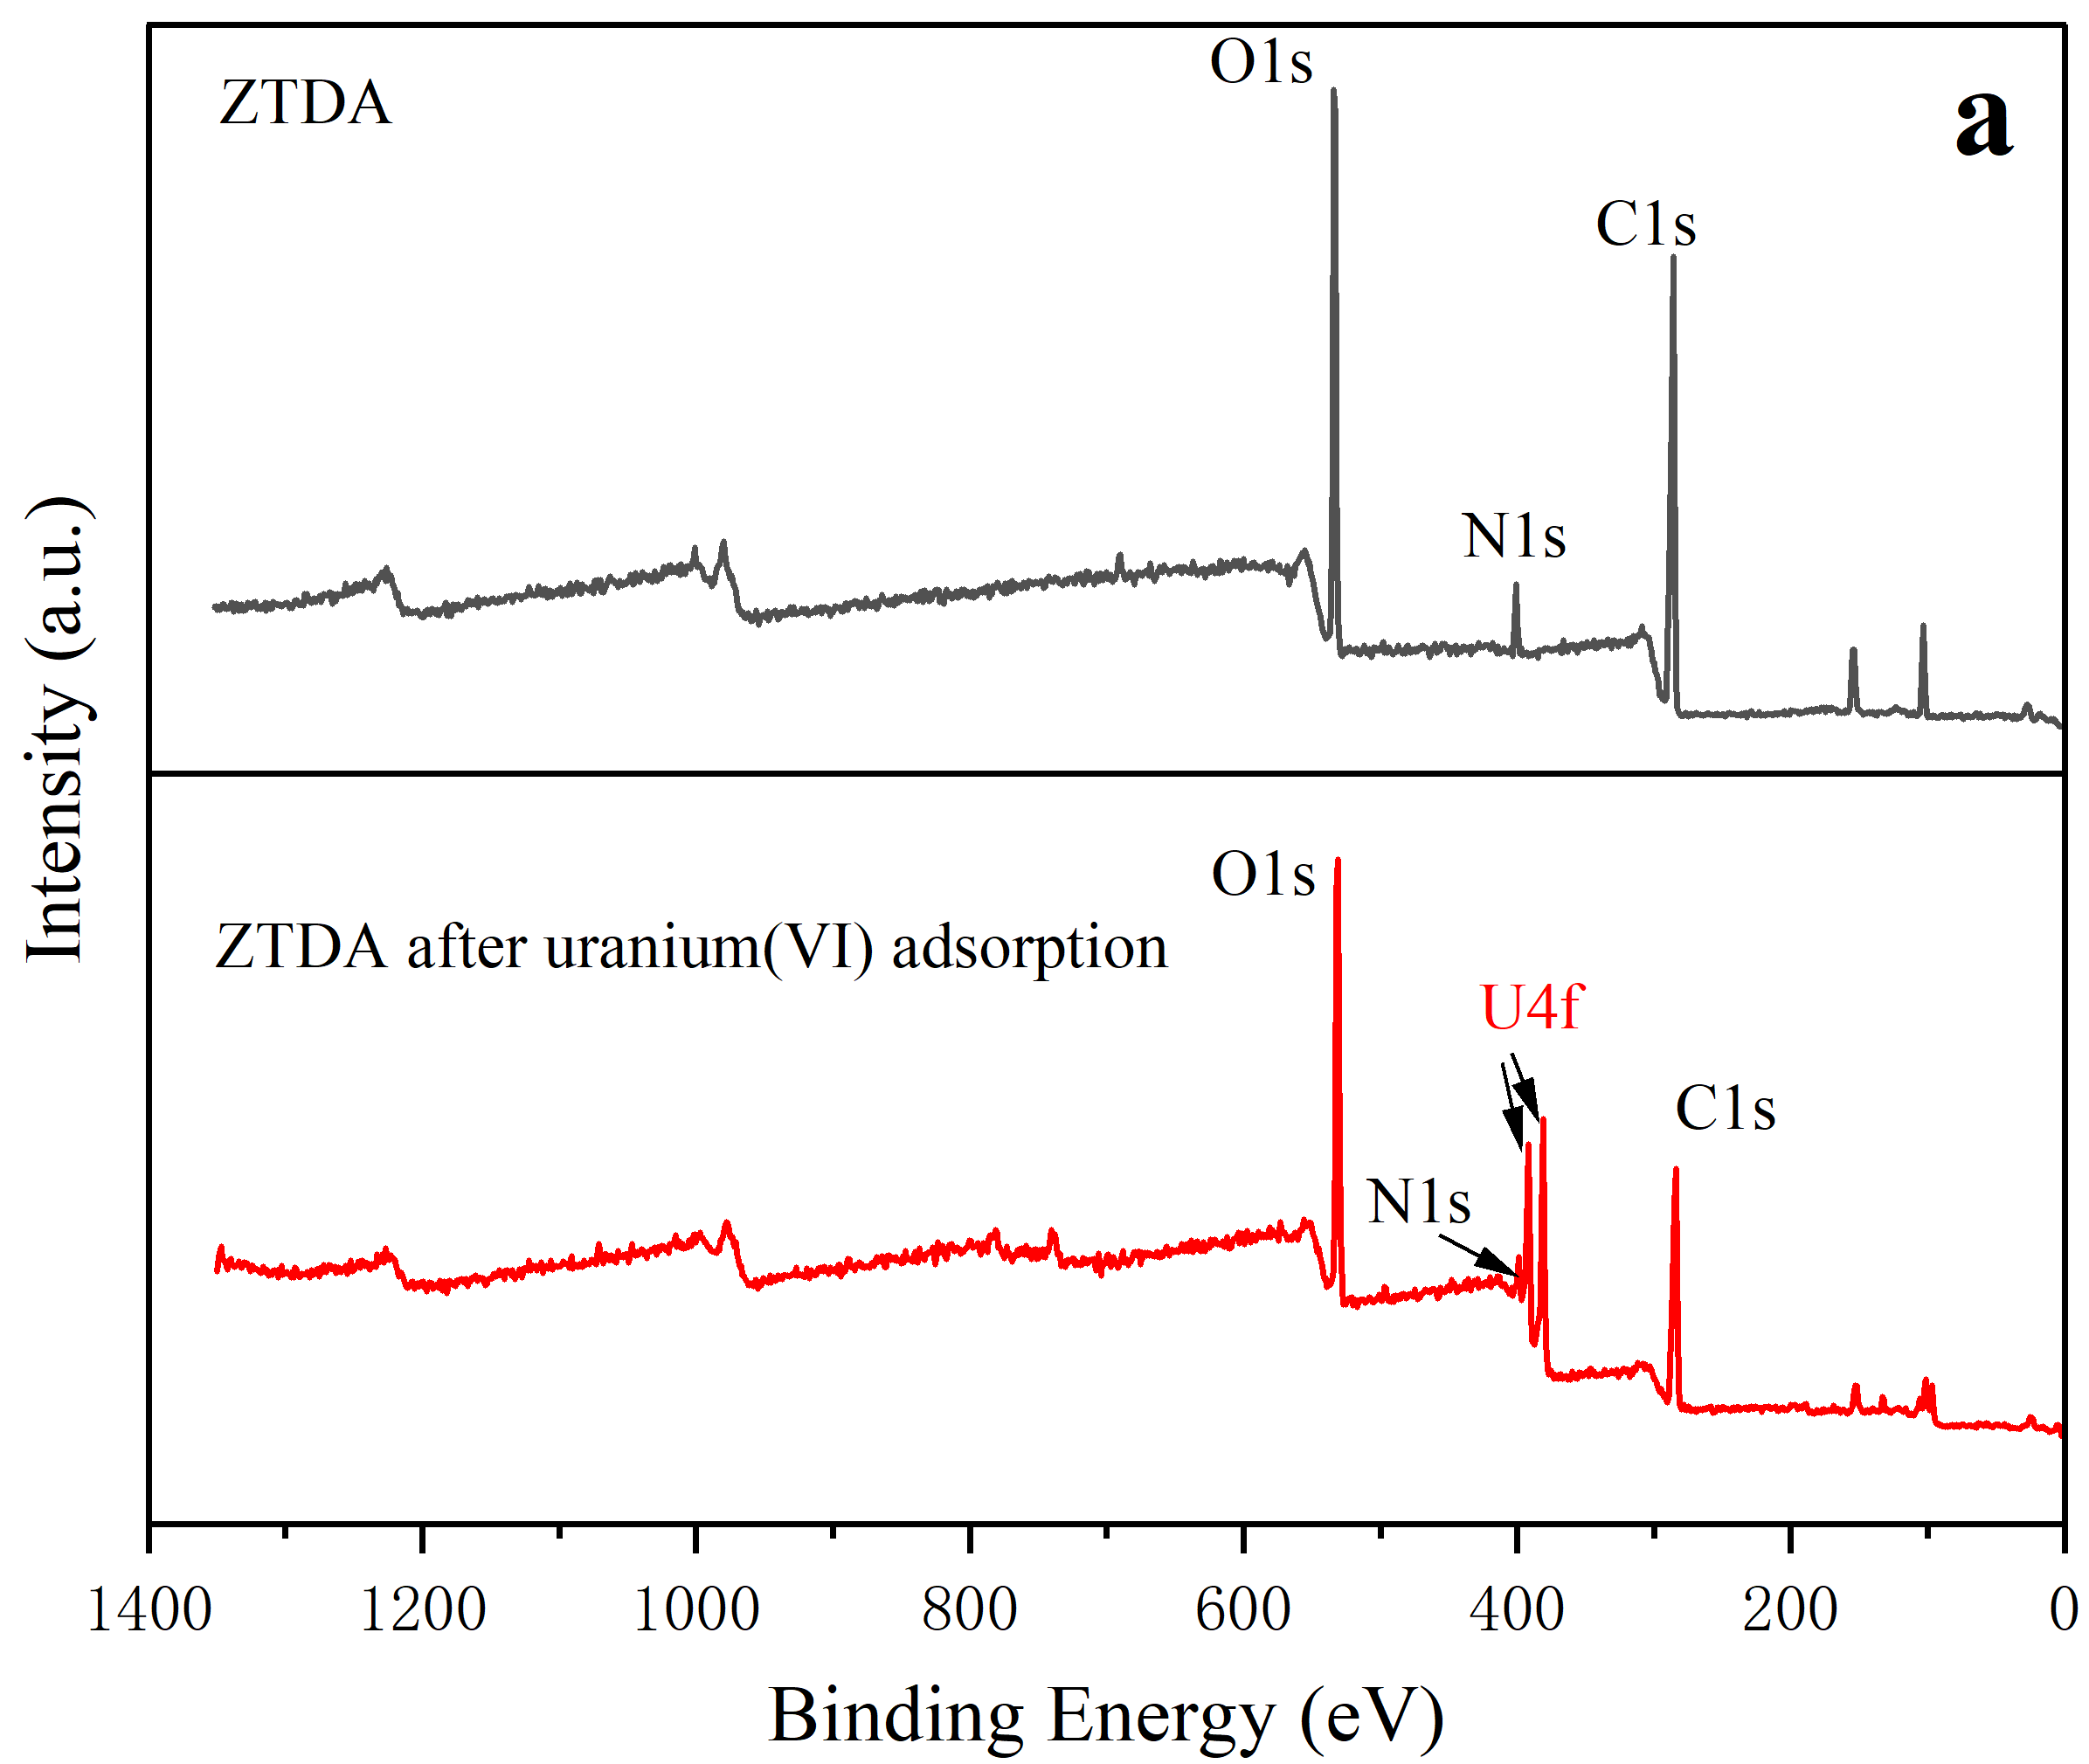

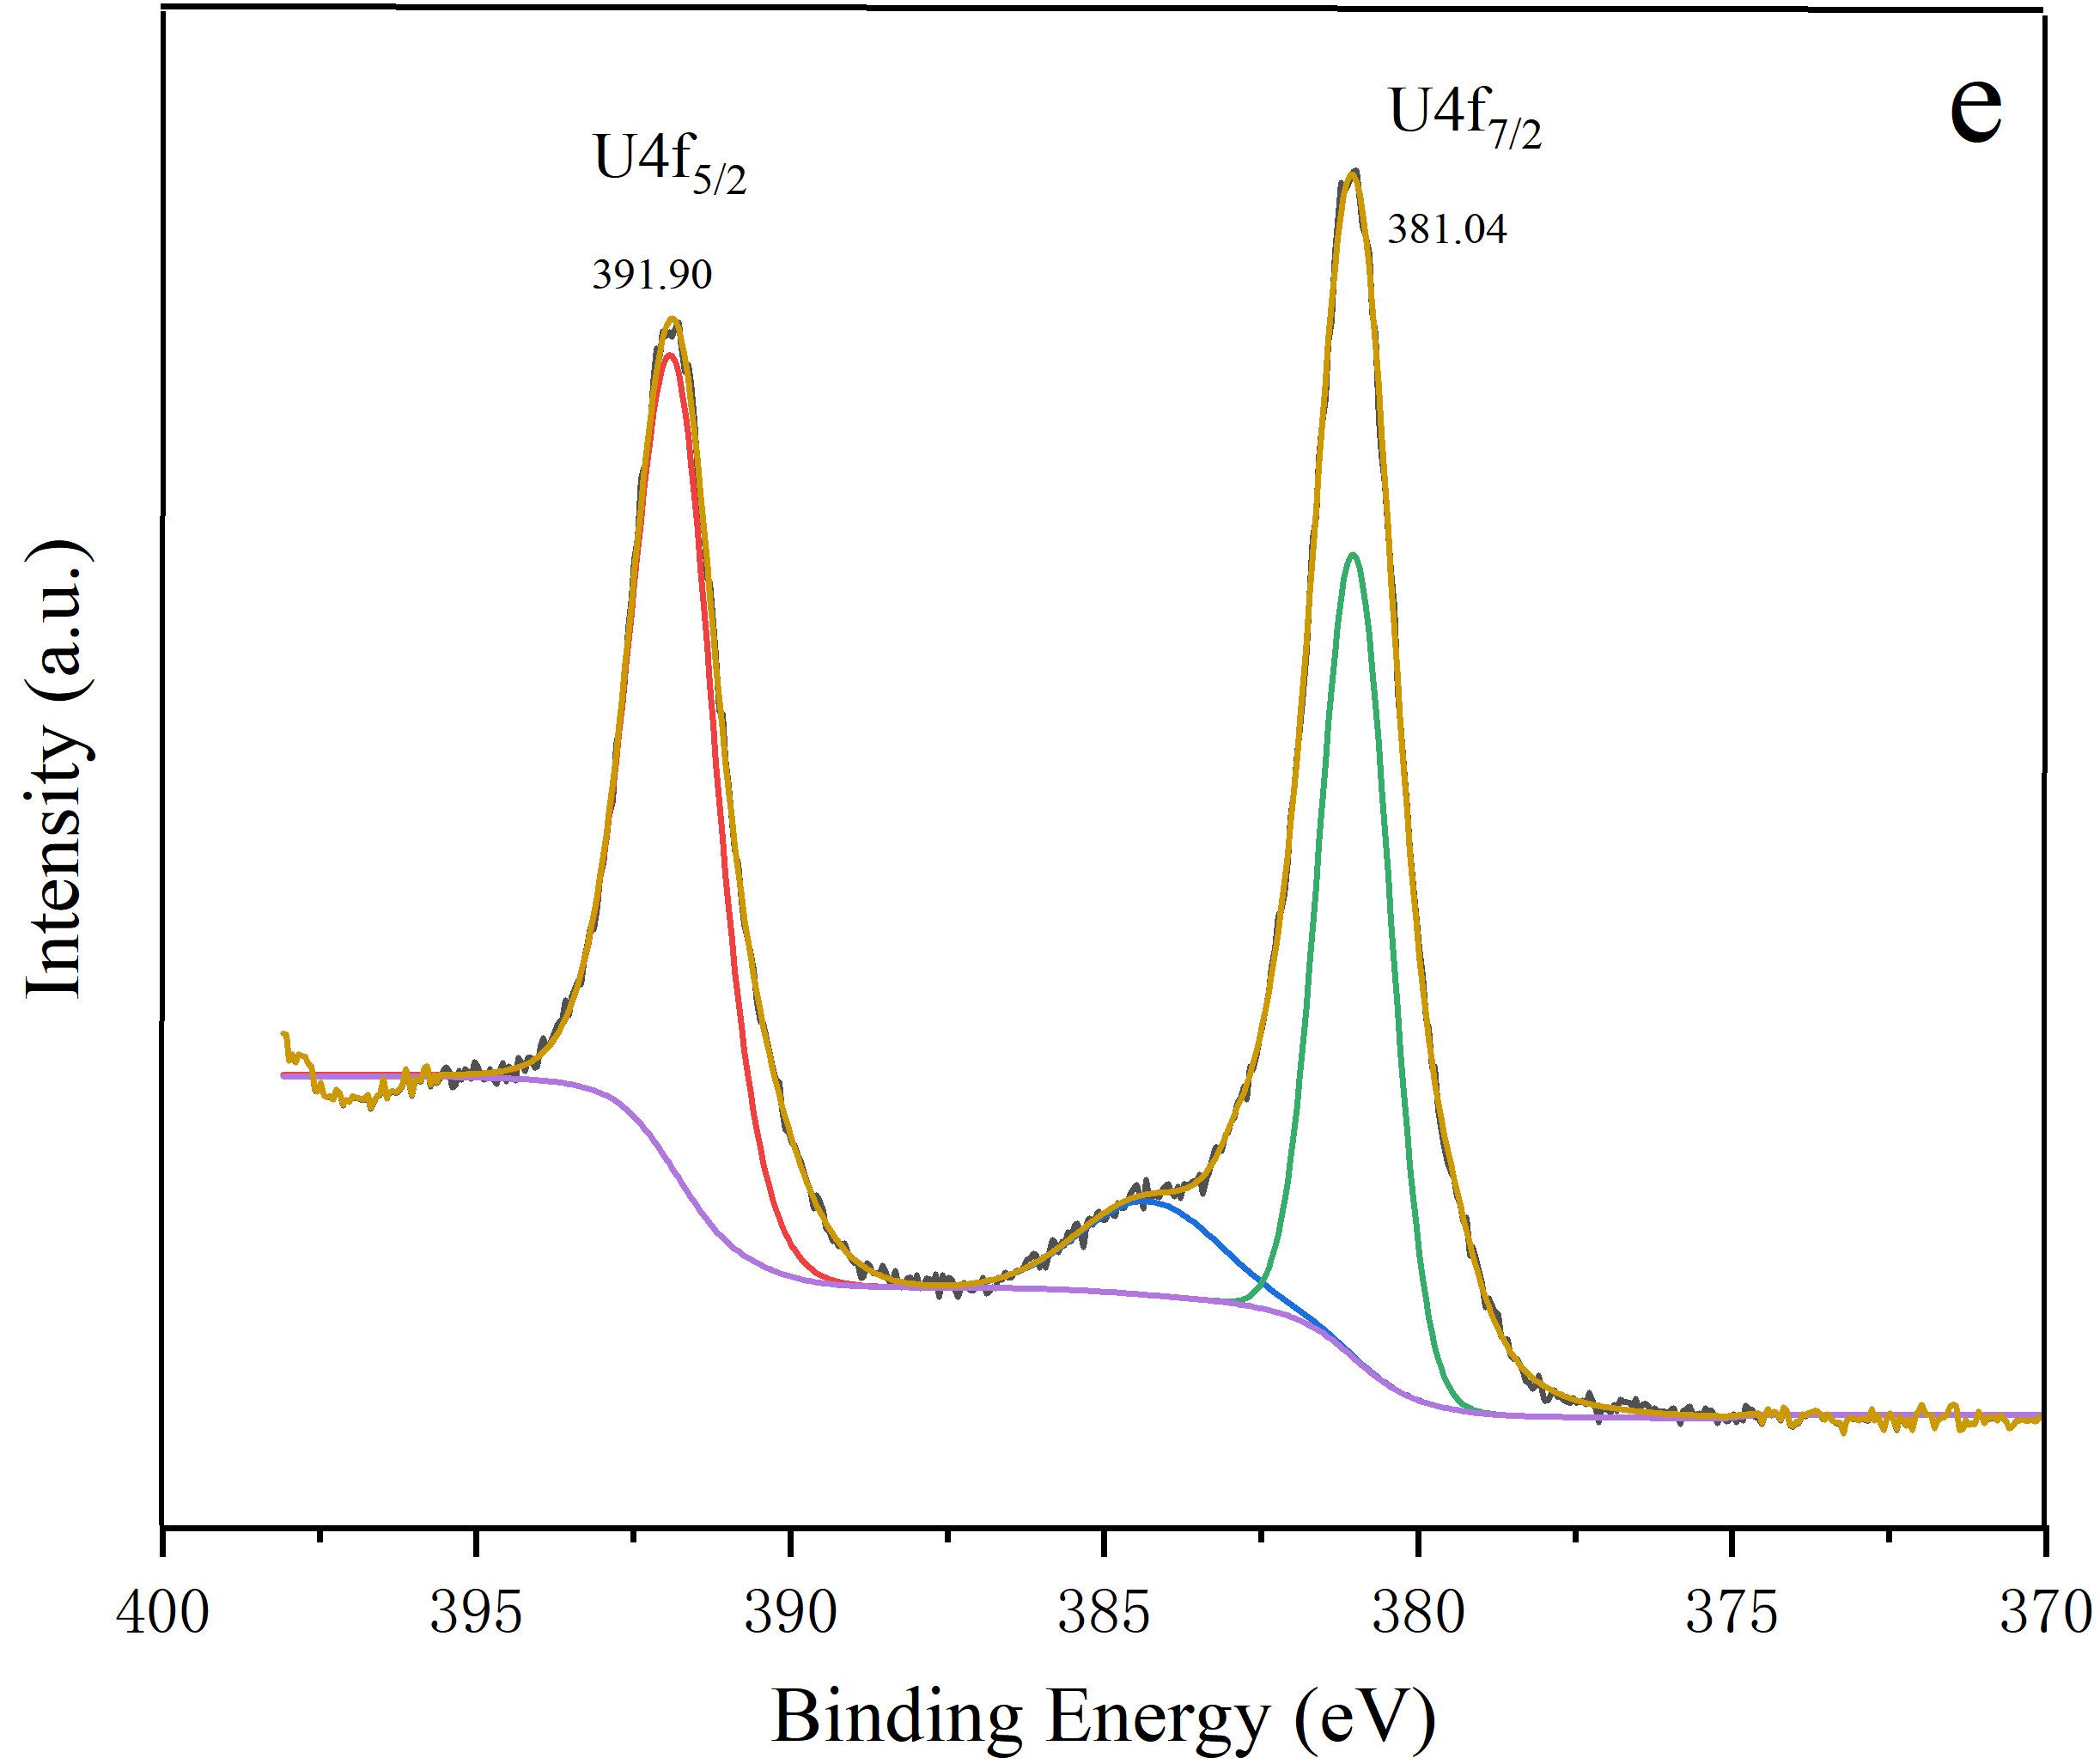

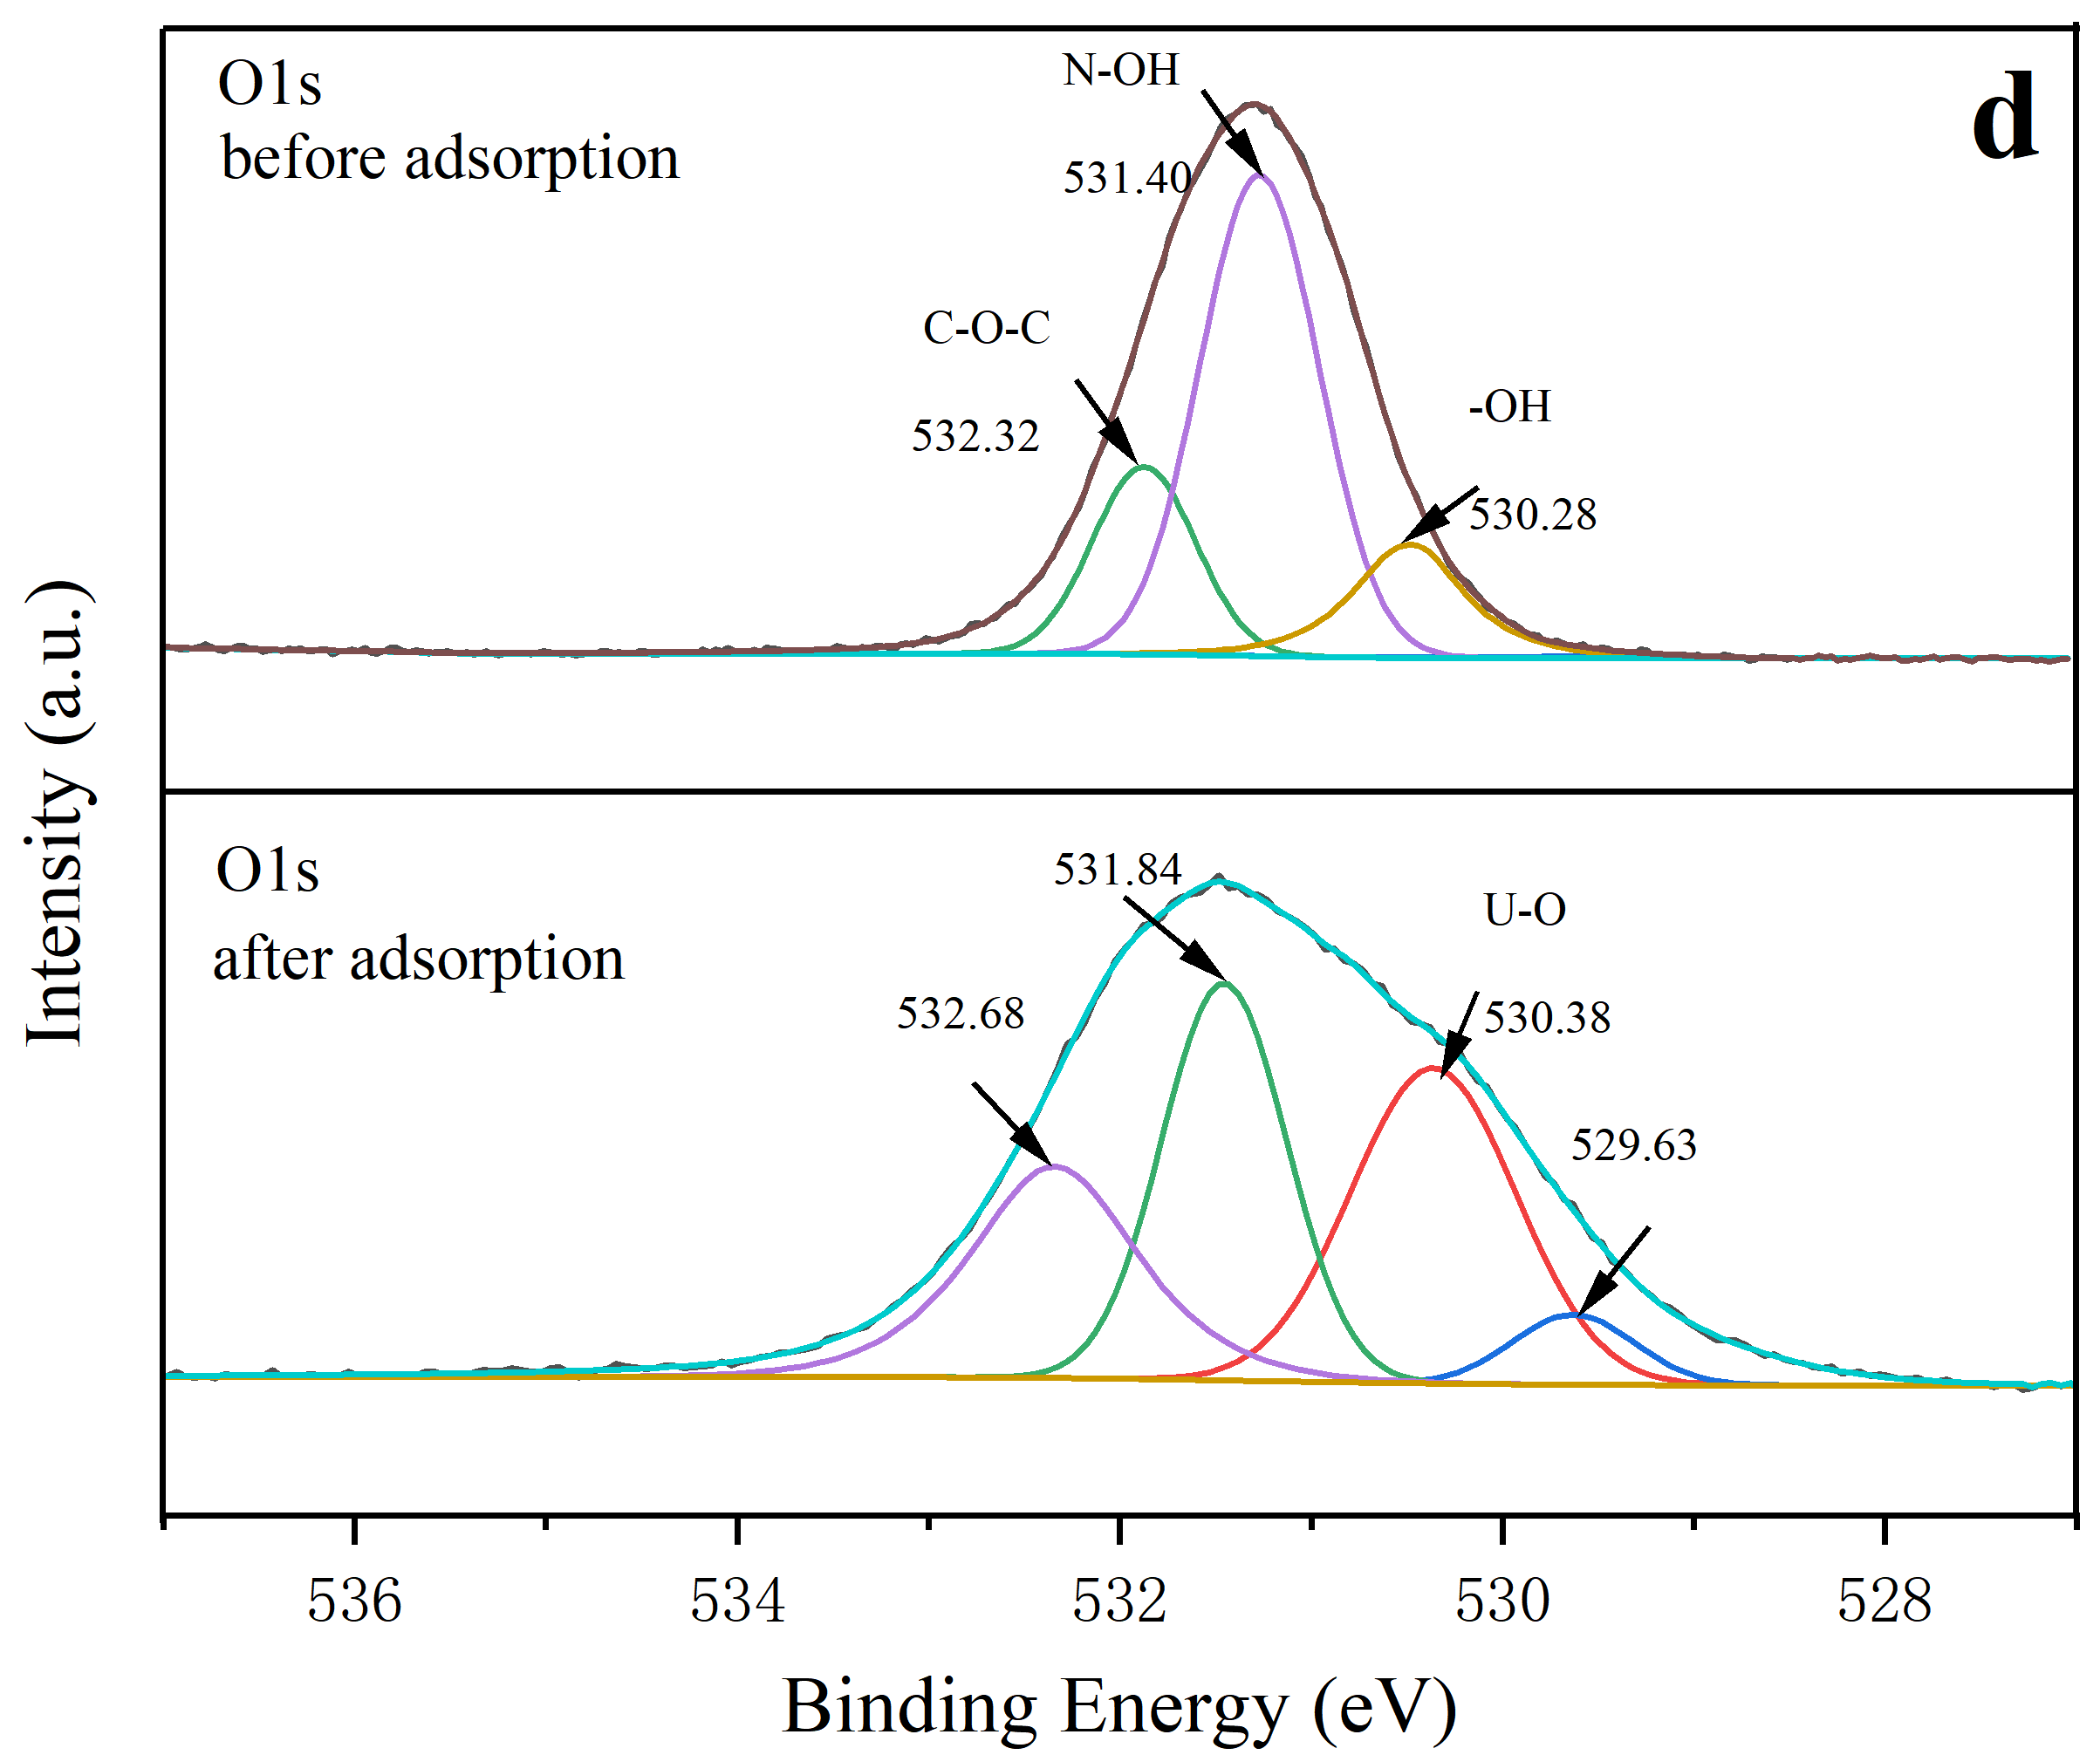

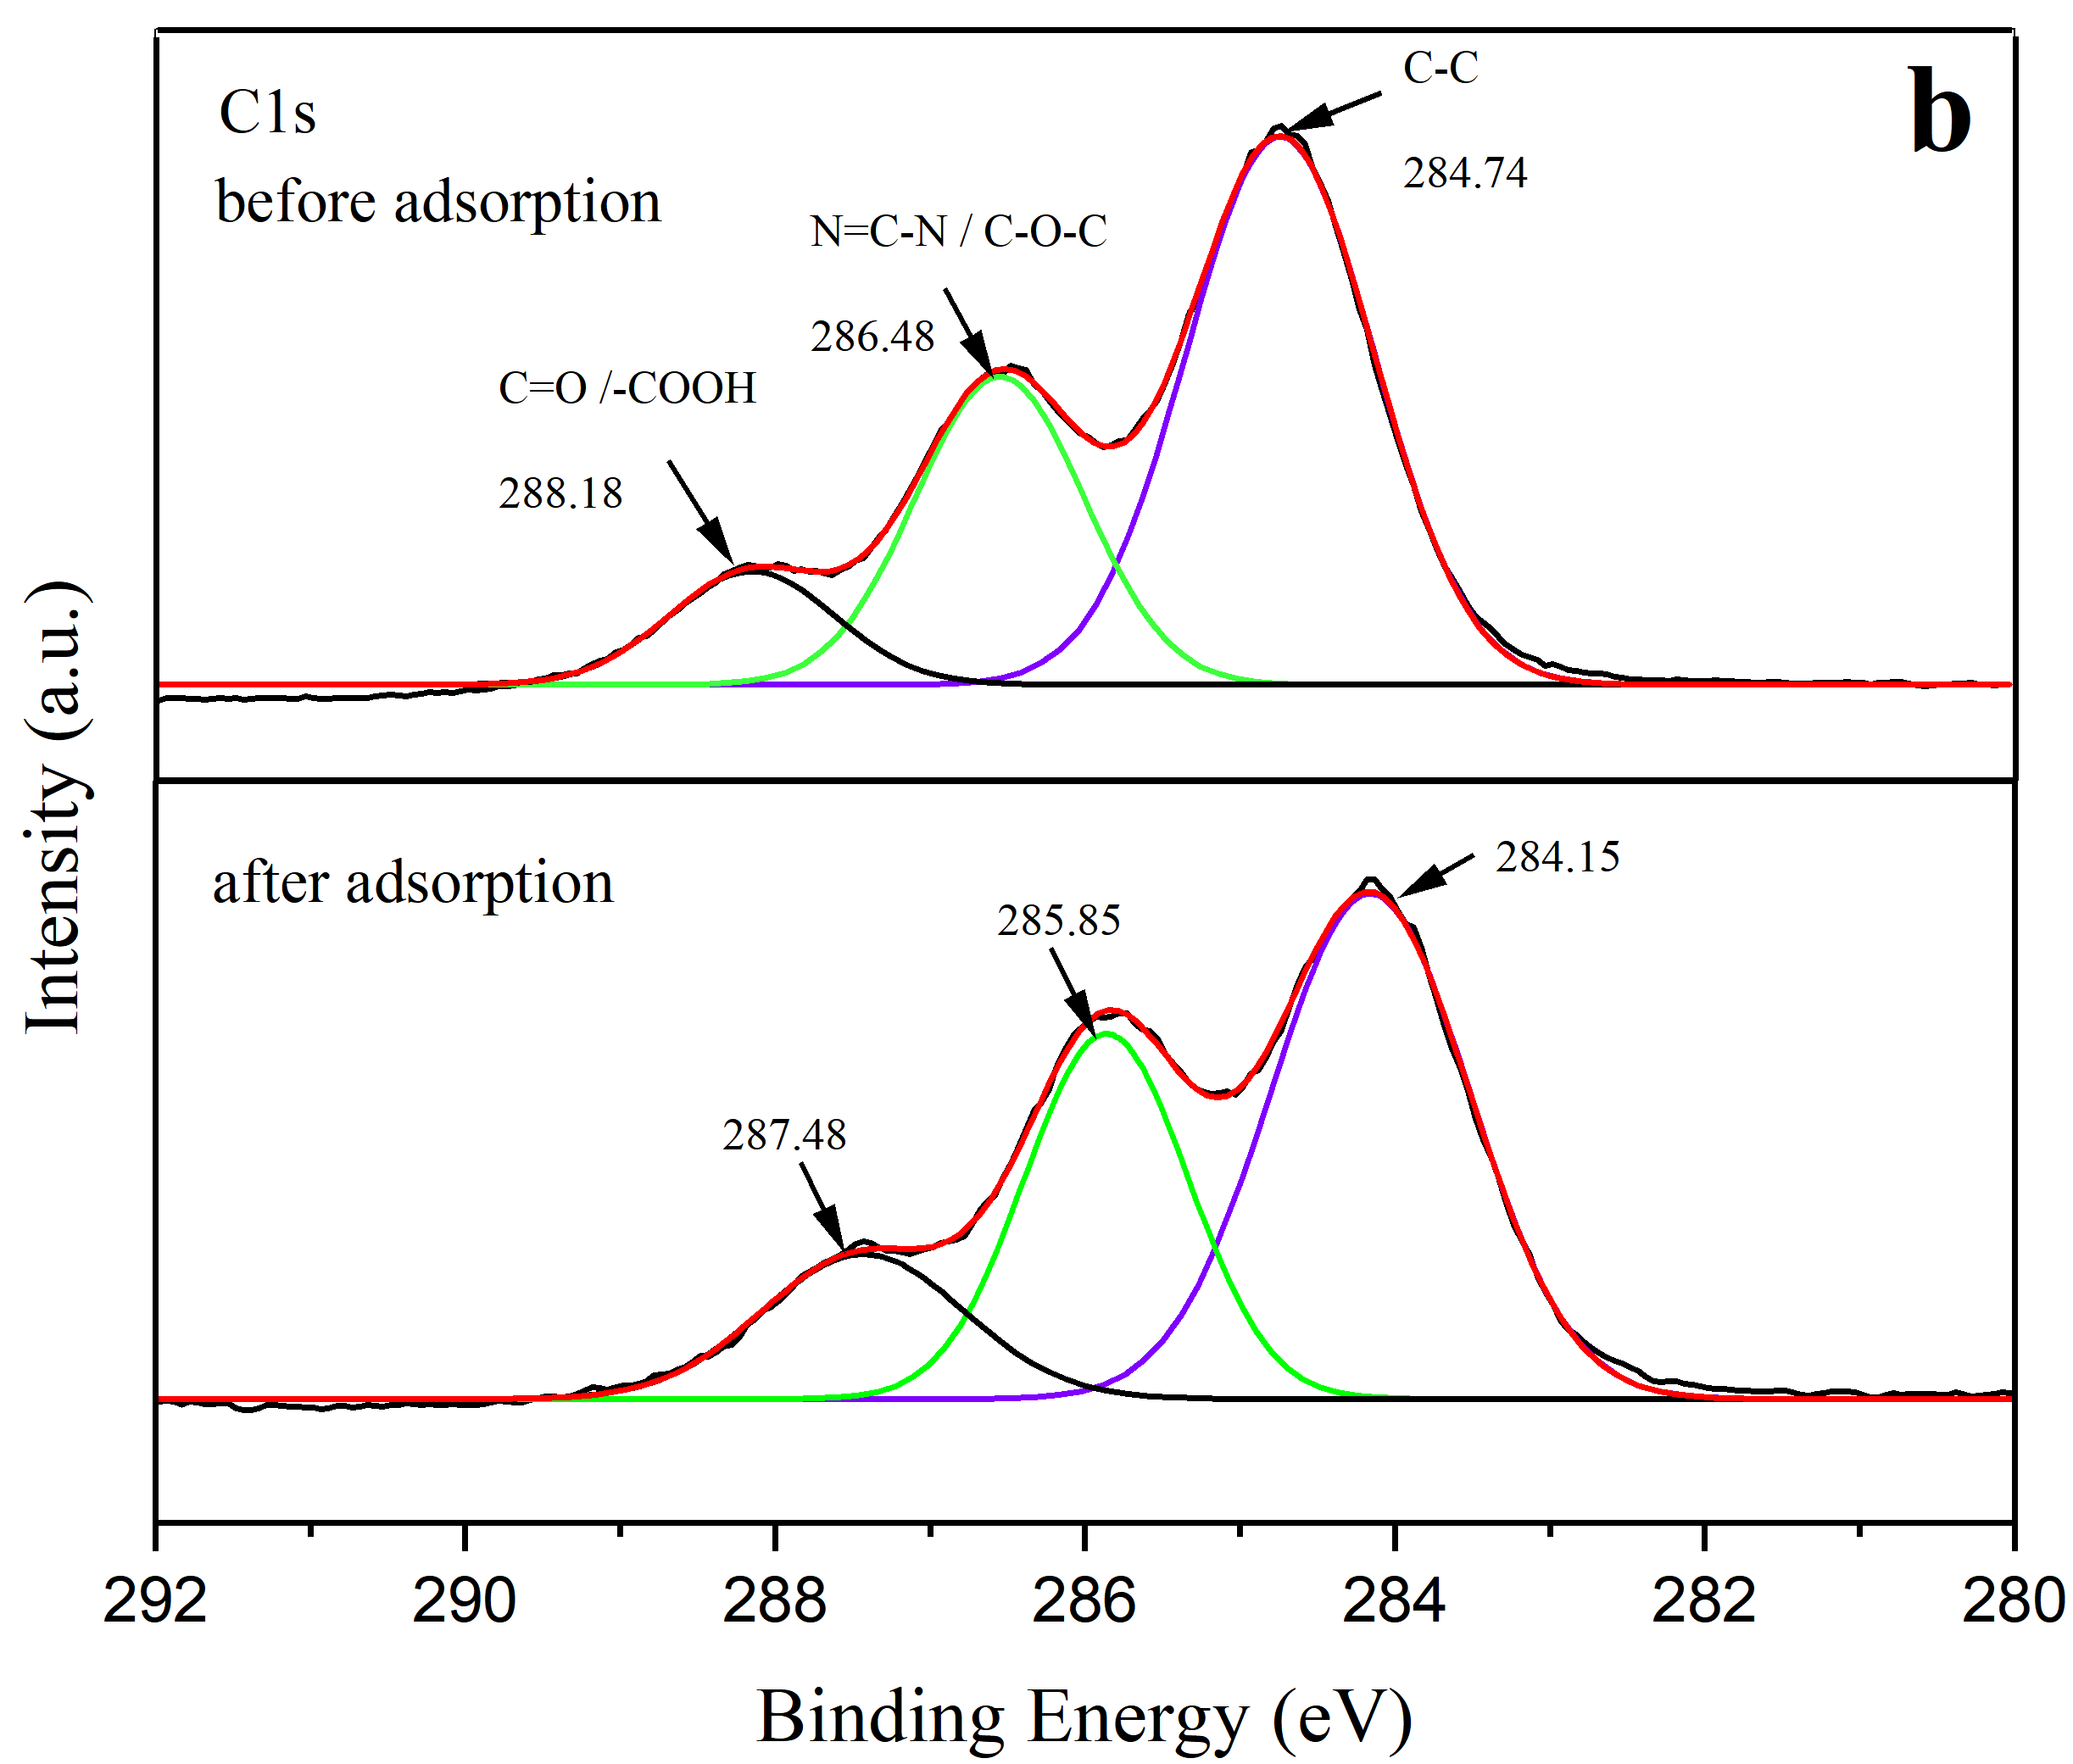

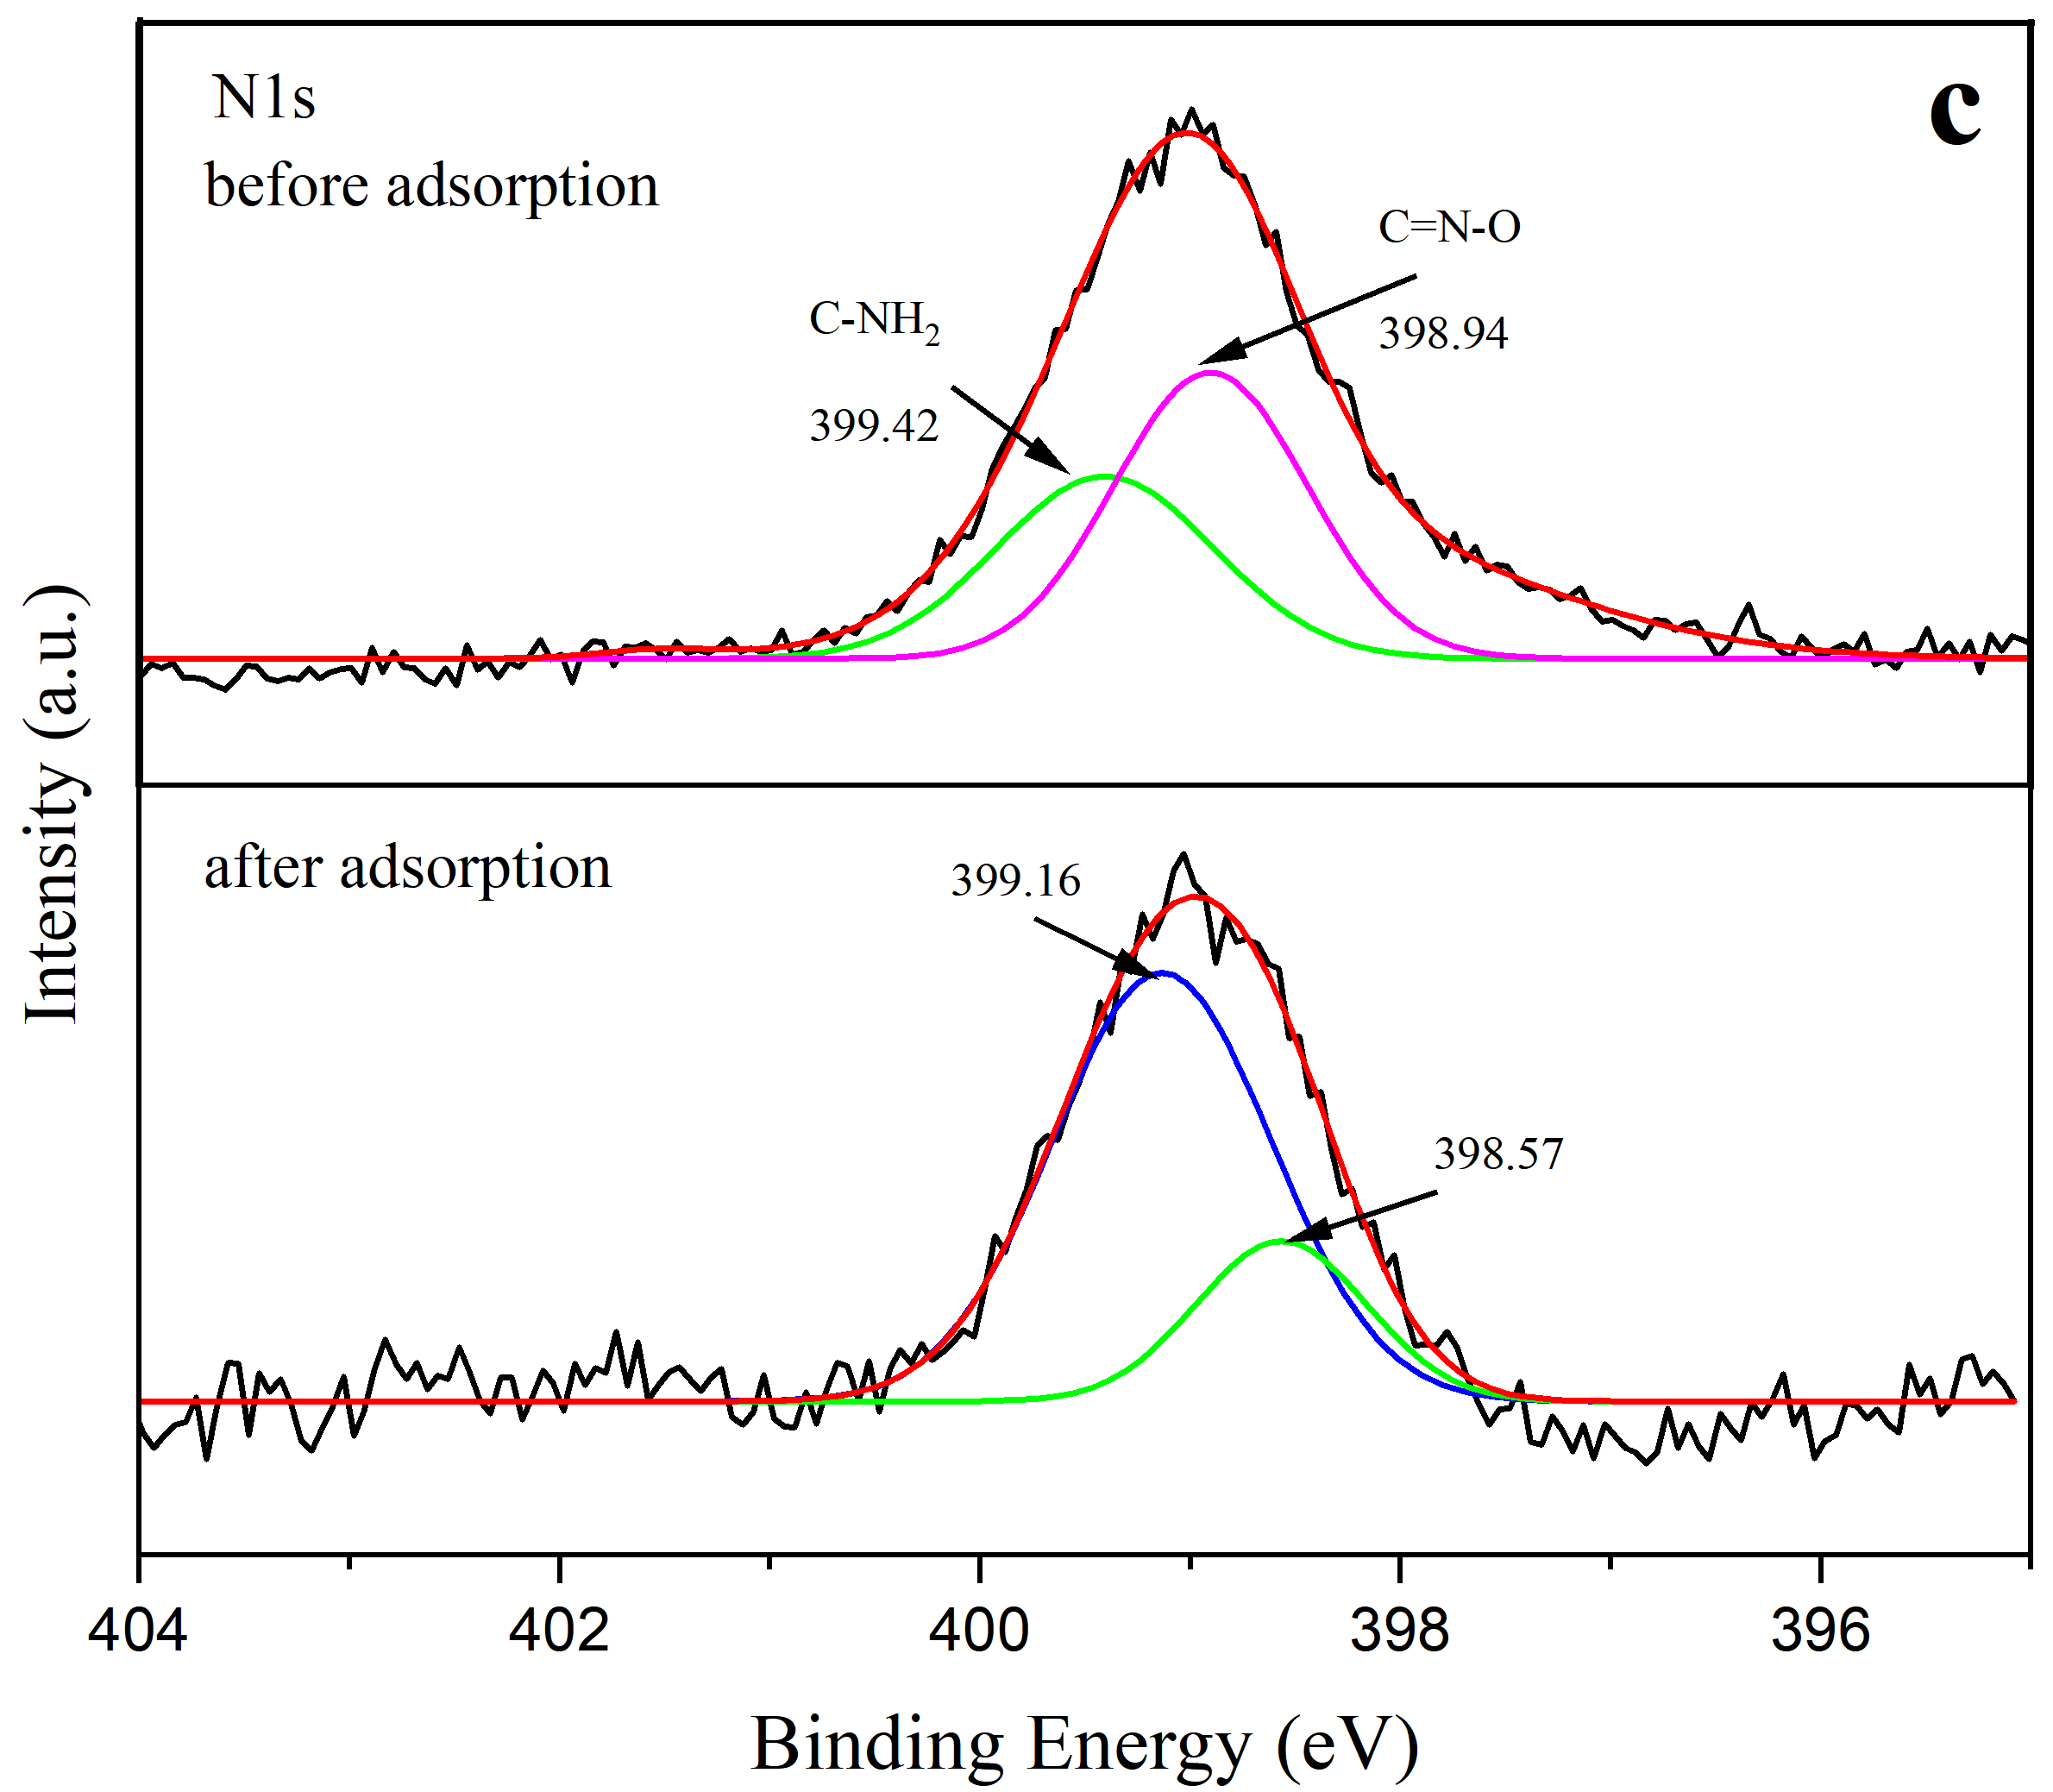


**Figure S1.** XPS spectra of ZTDA. **a**. Full pattern of ZTDA. **b**. C1s. **c**. N1s. **d**.O1s. **e**. U4f


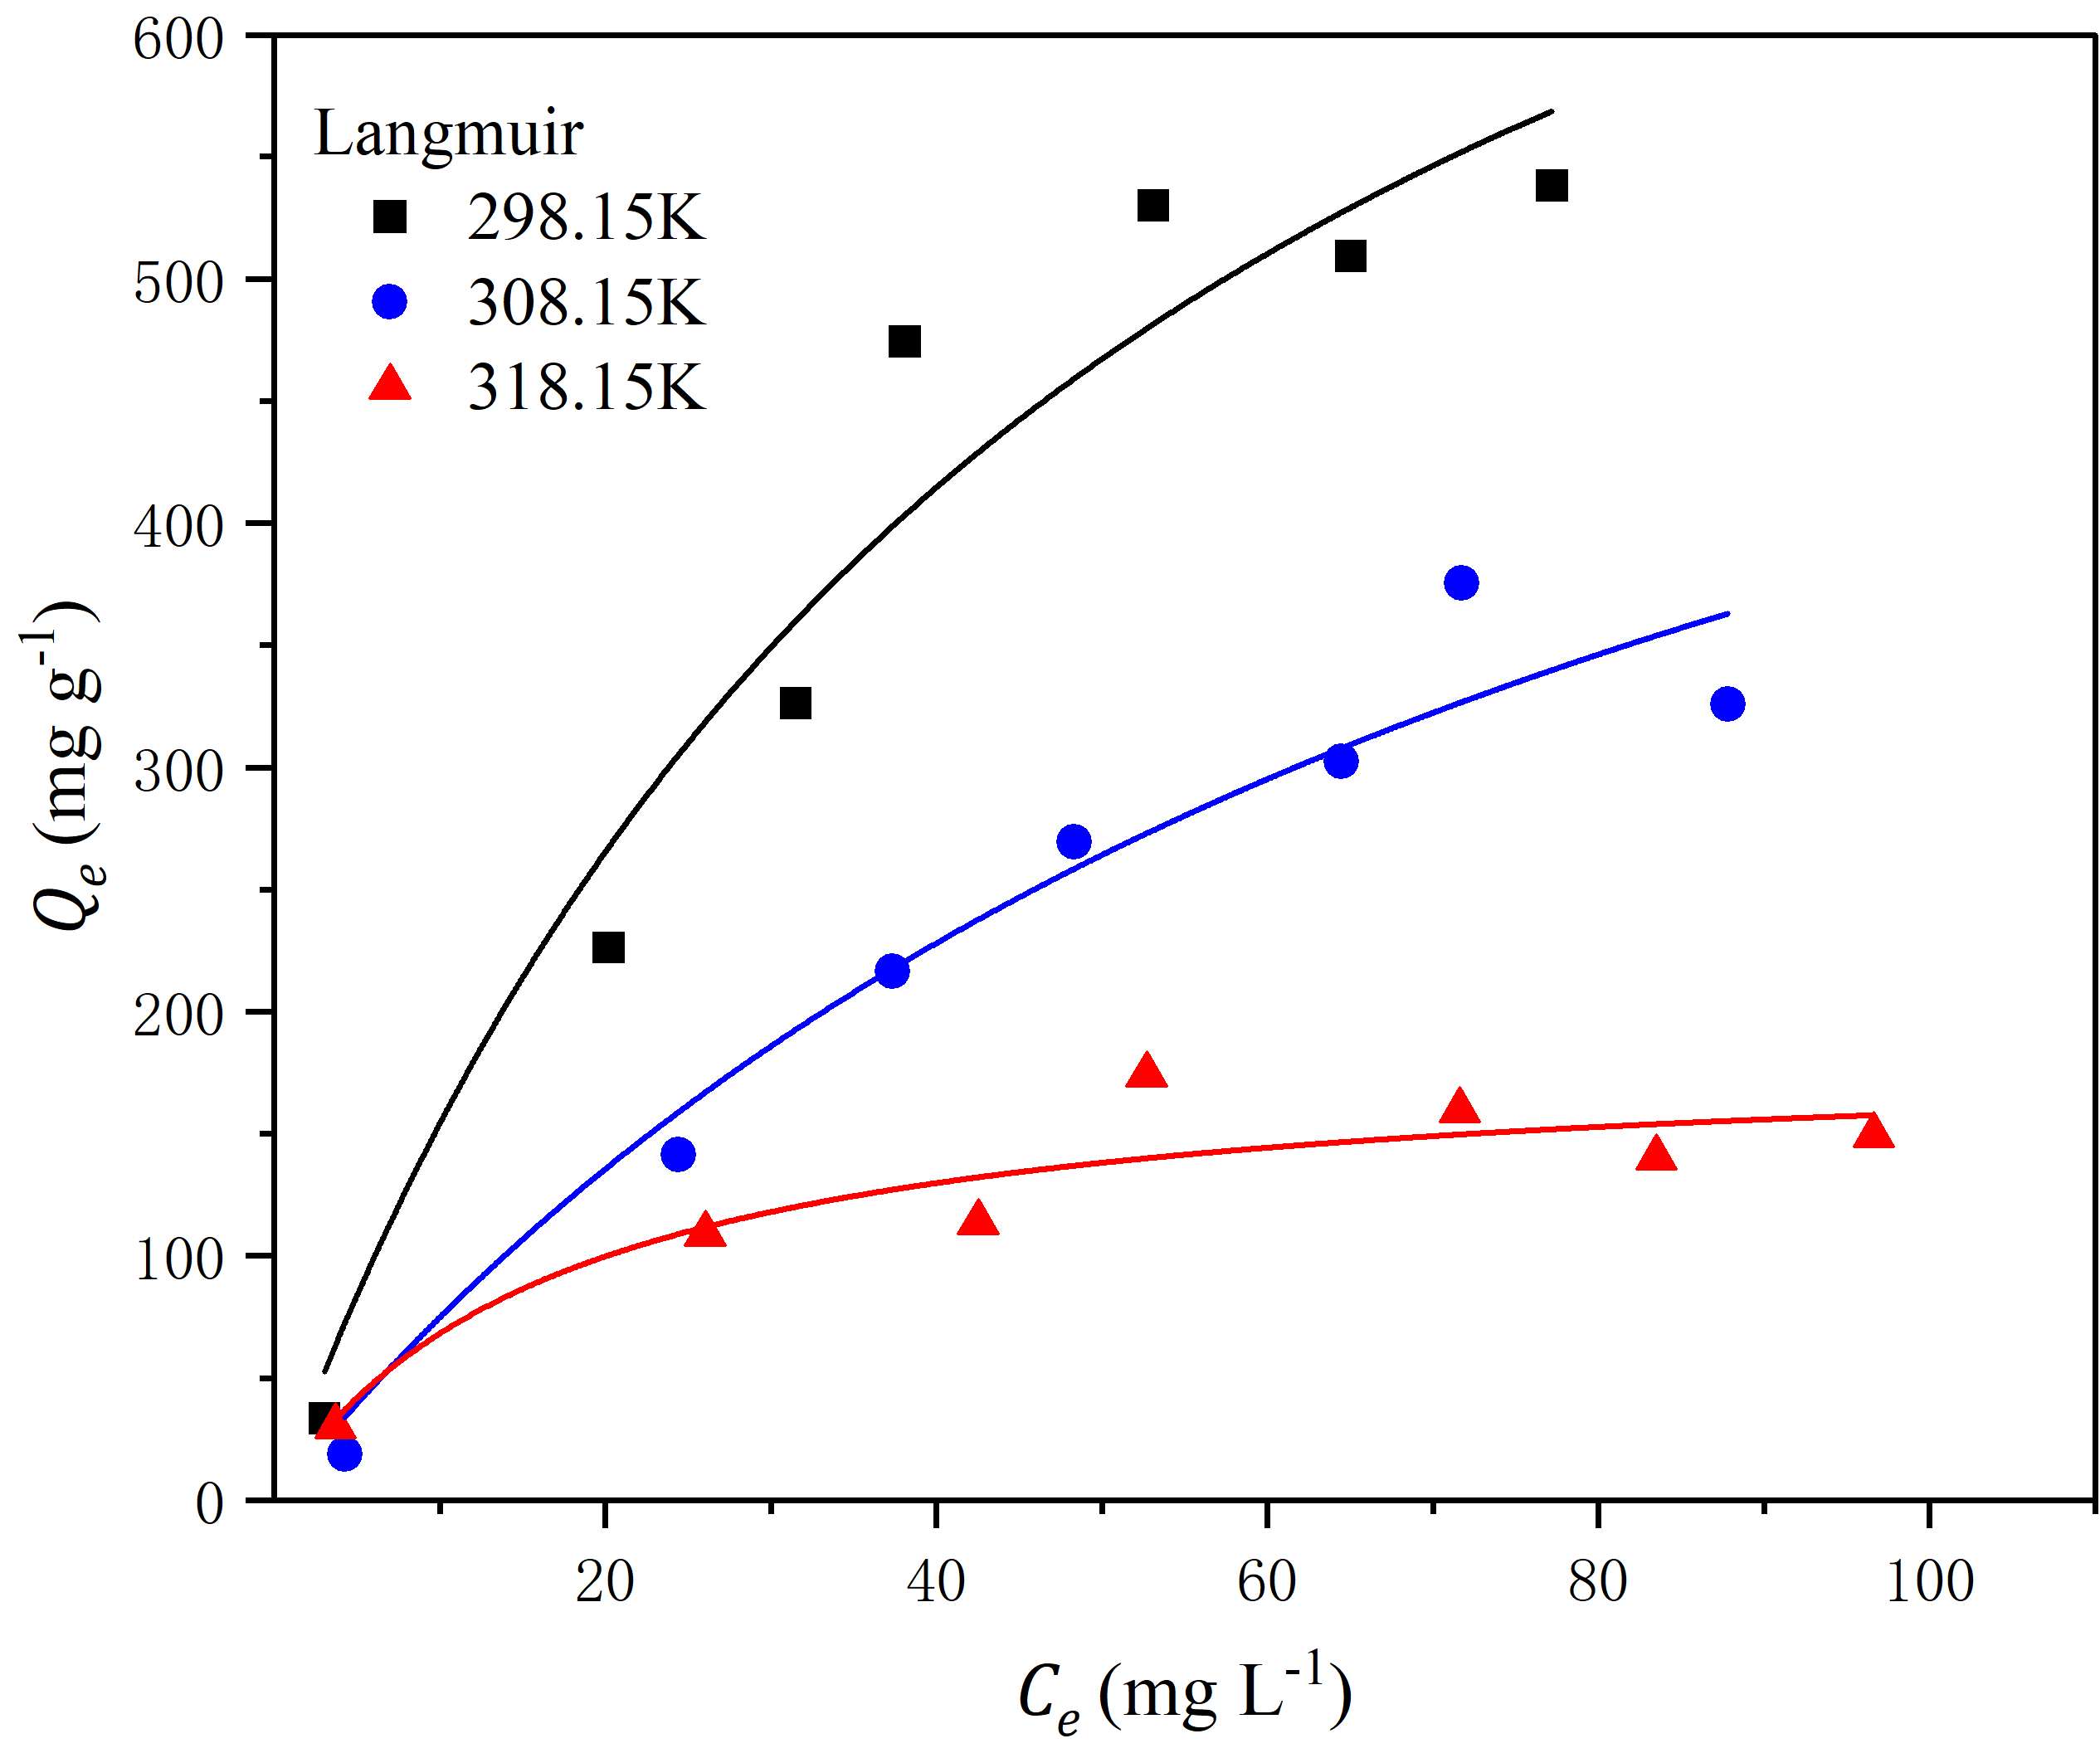

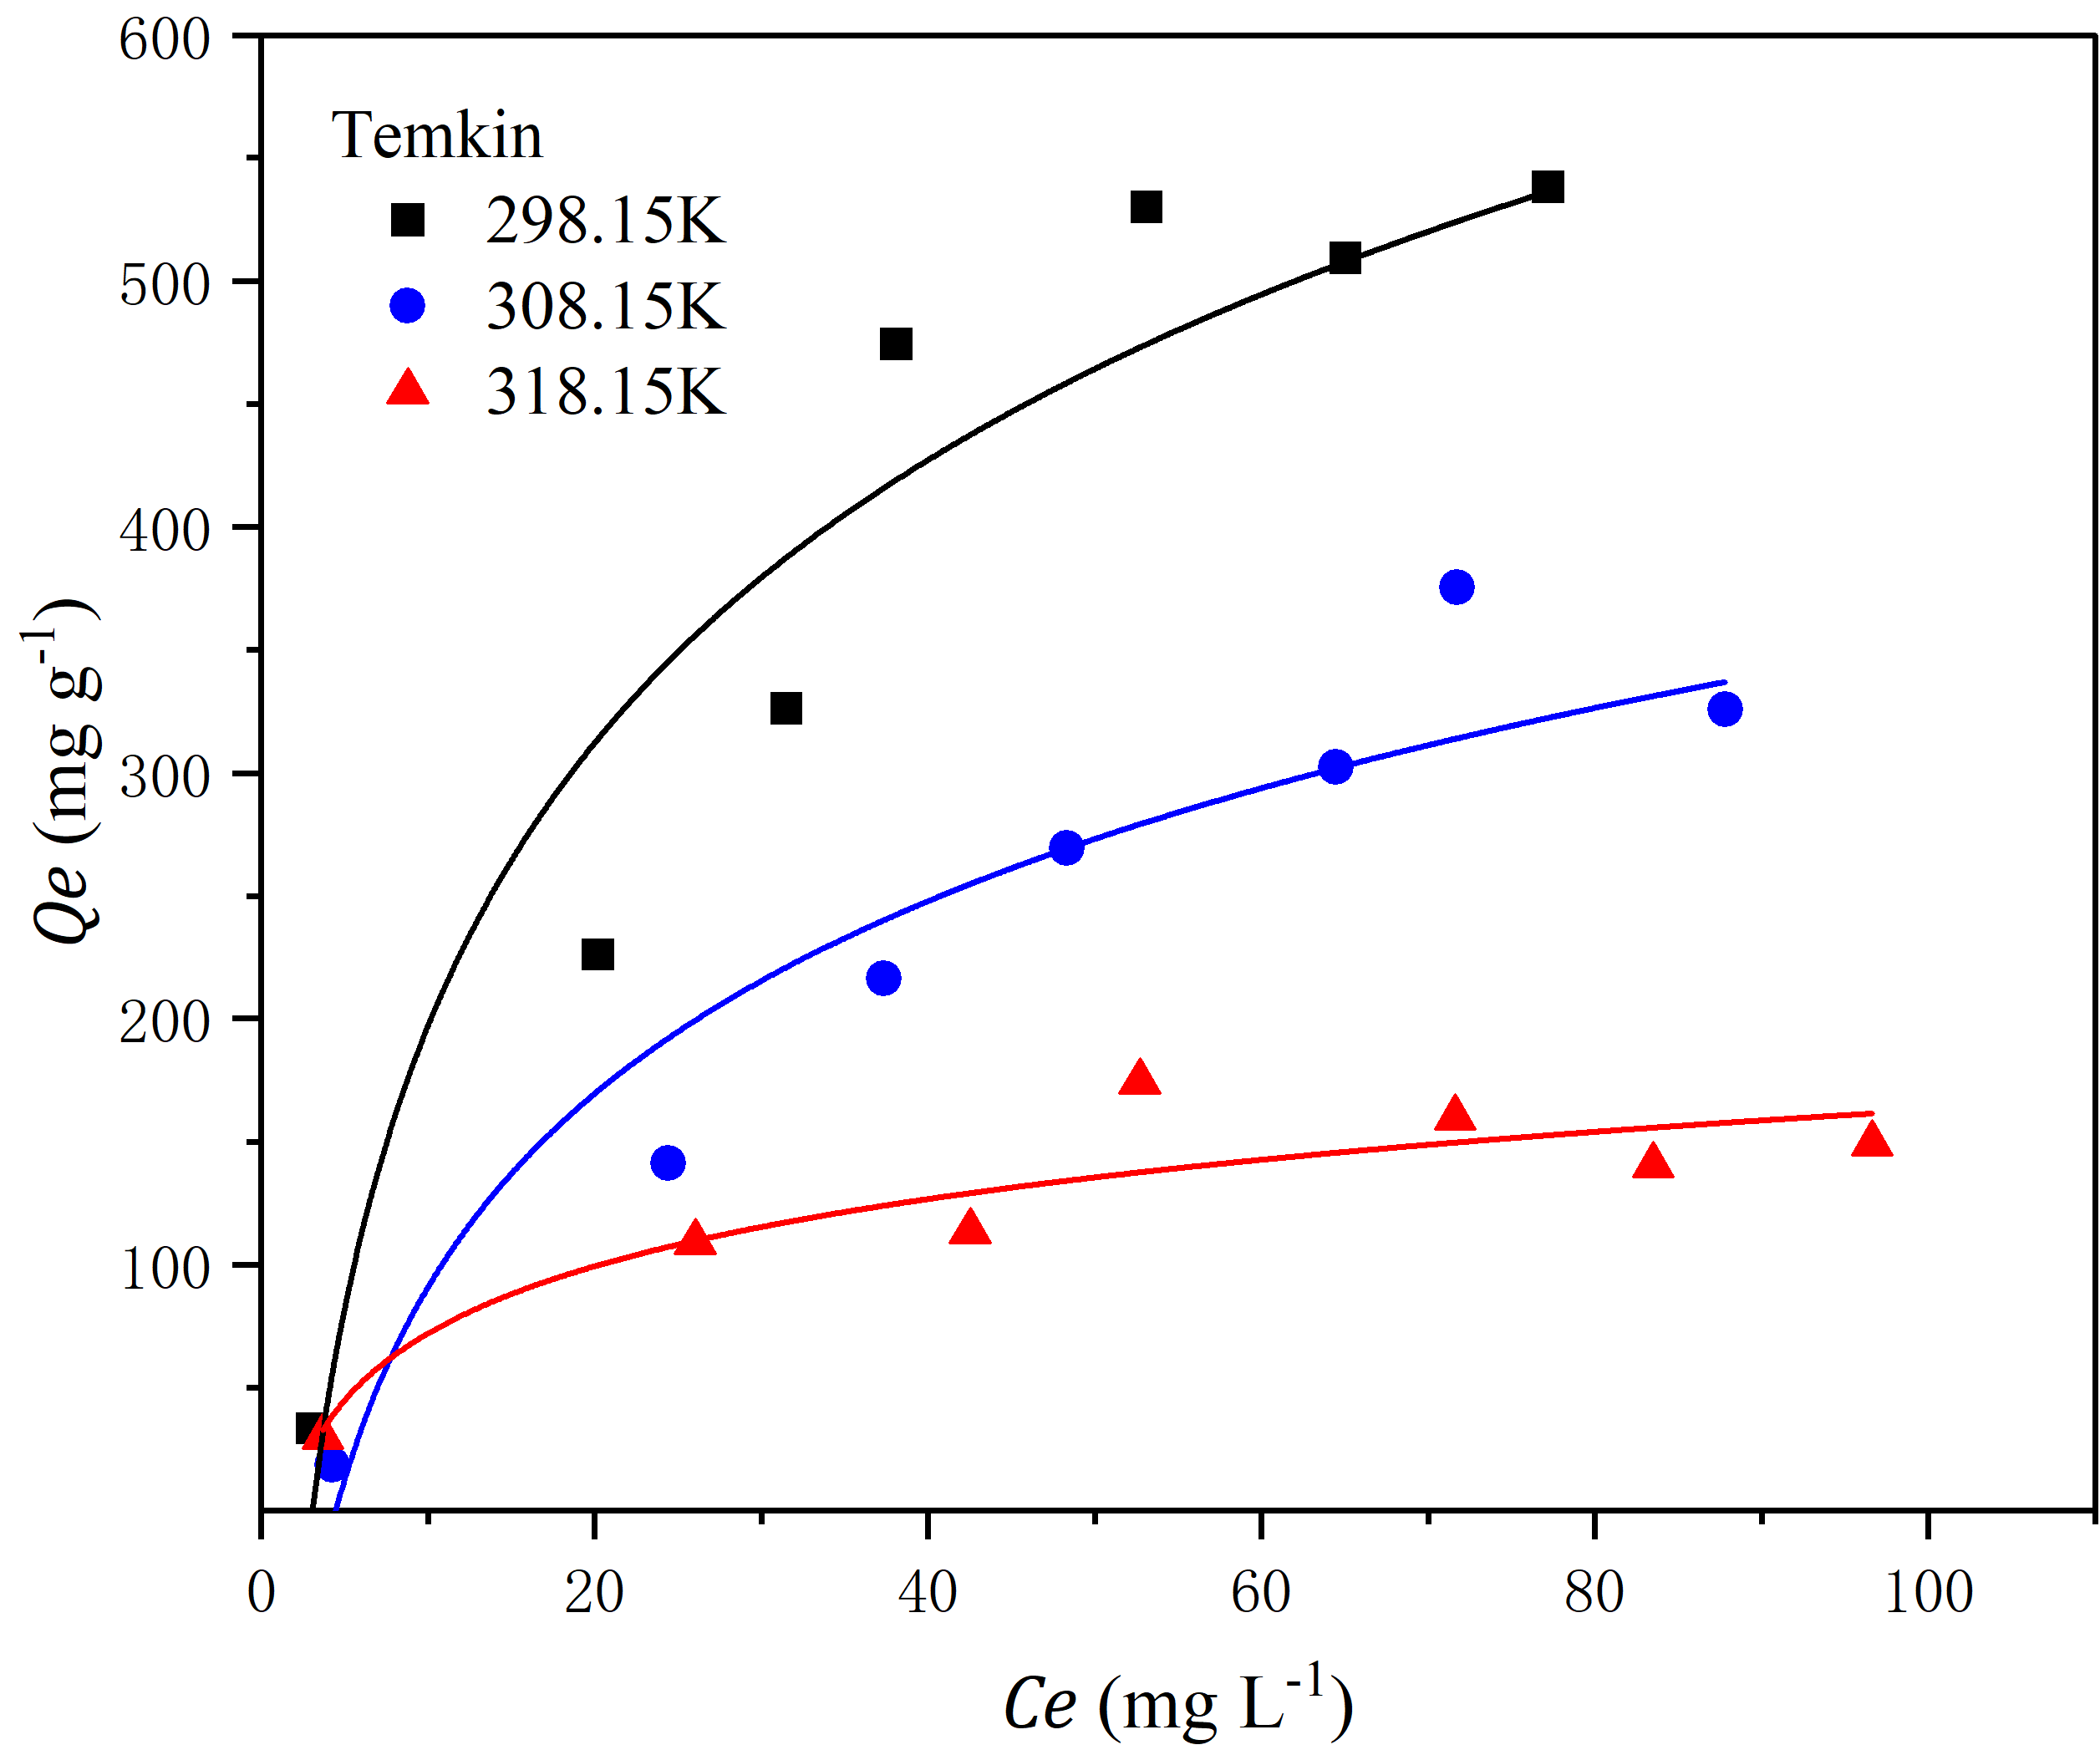

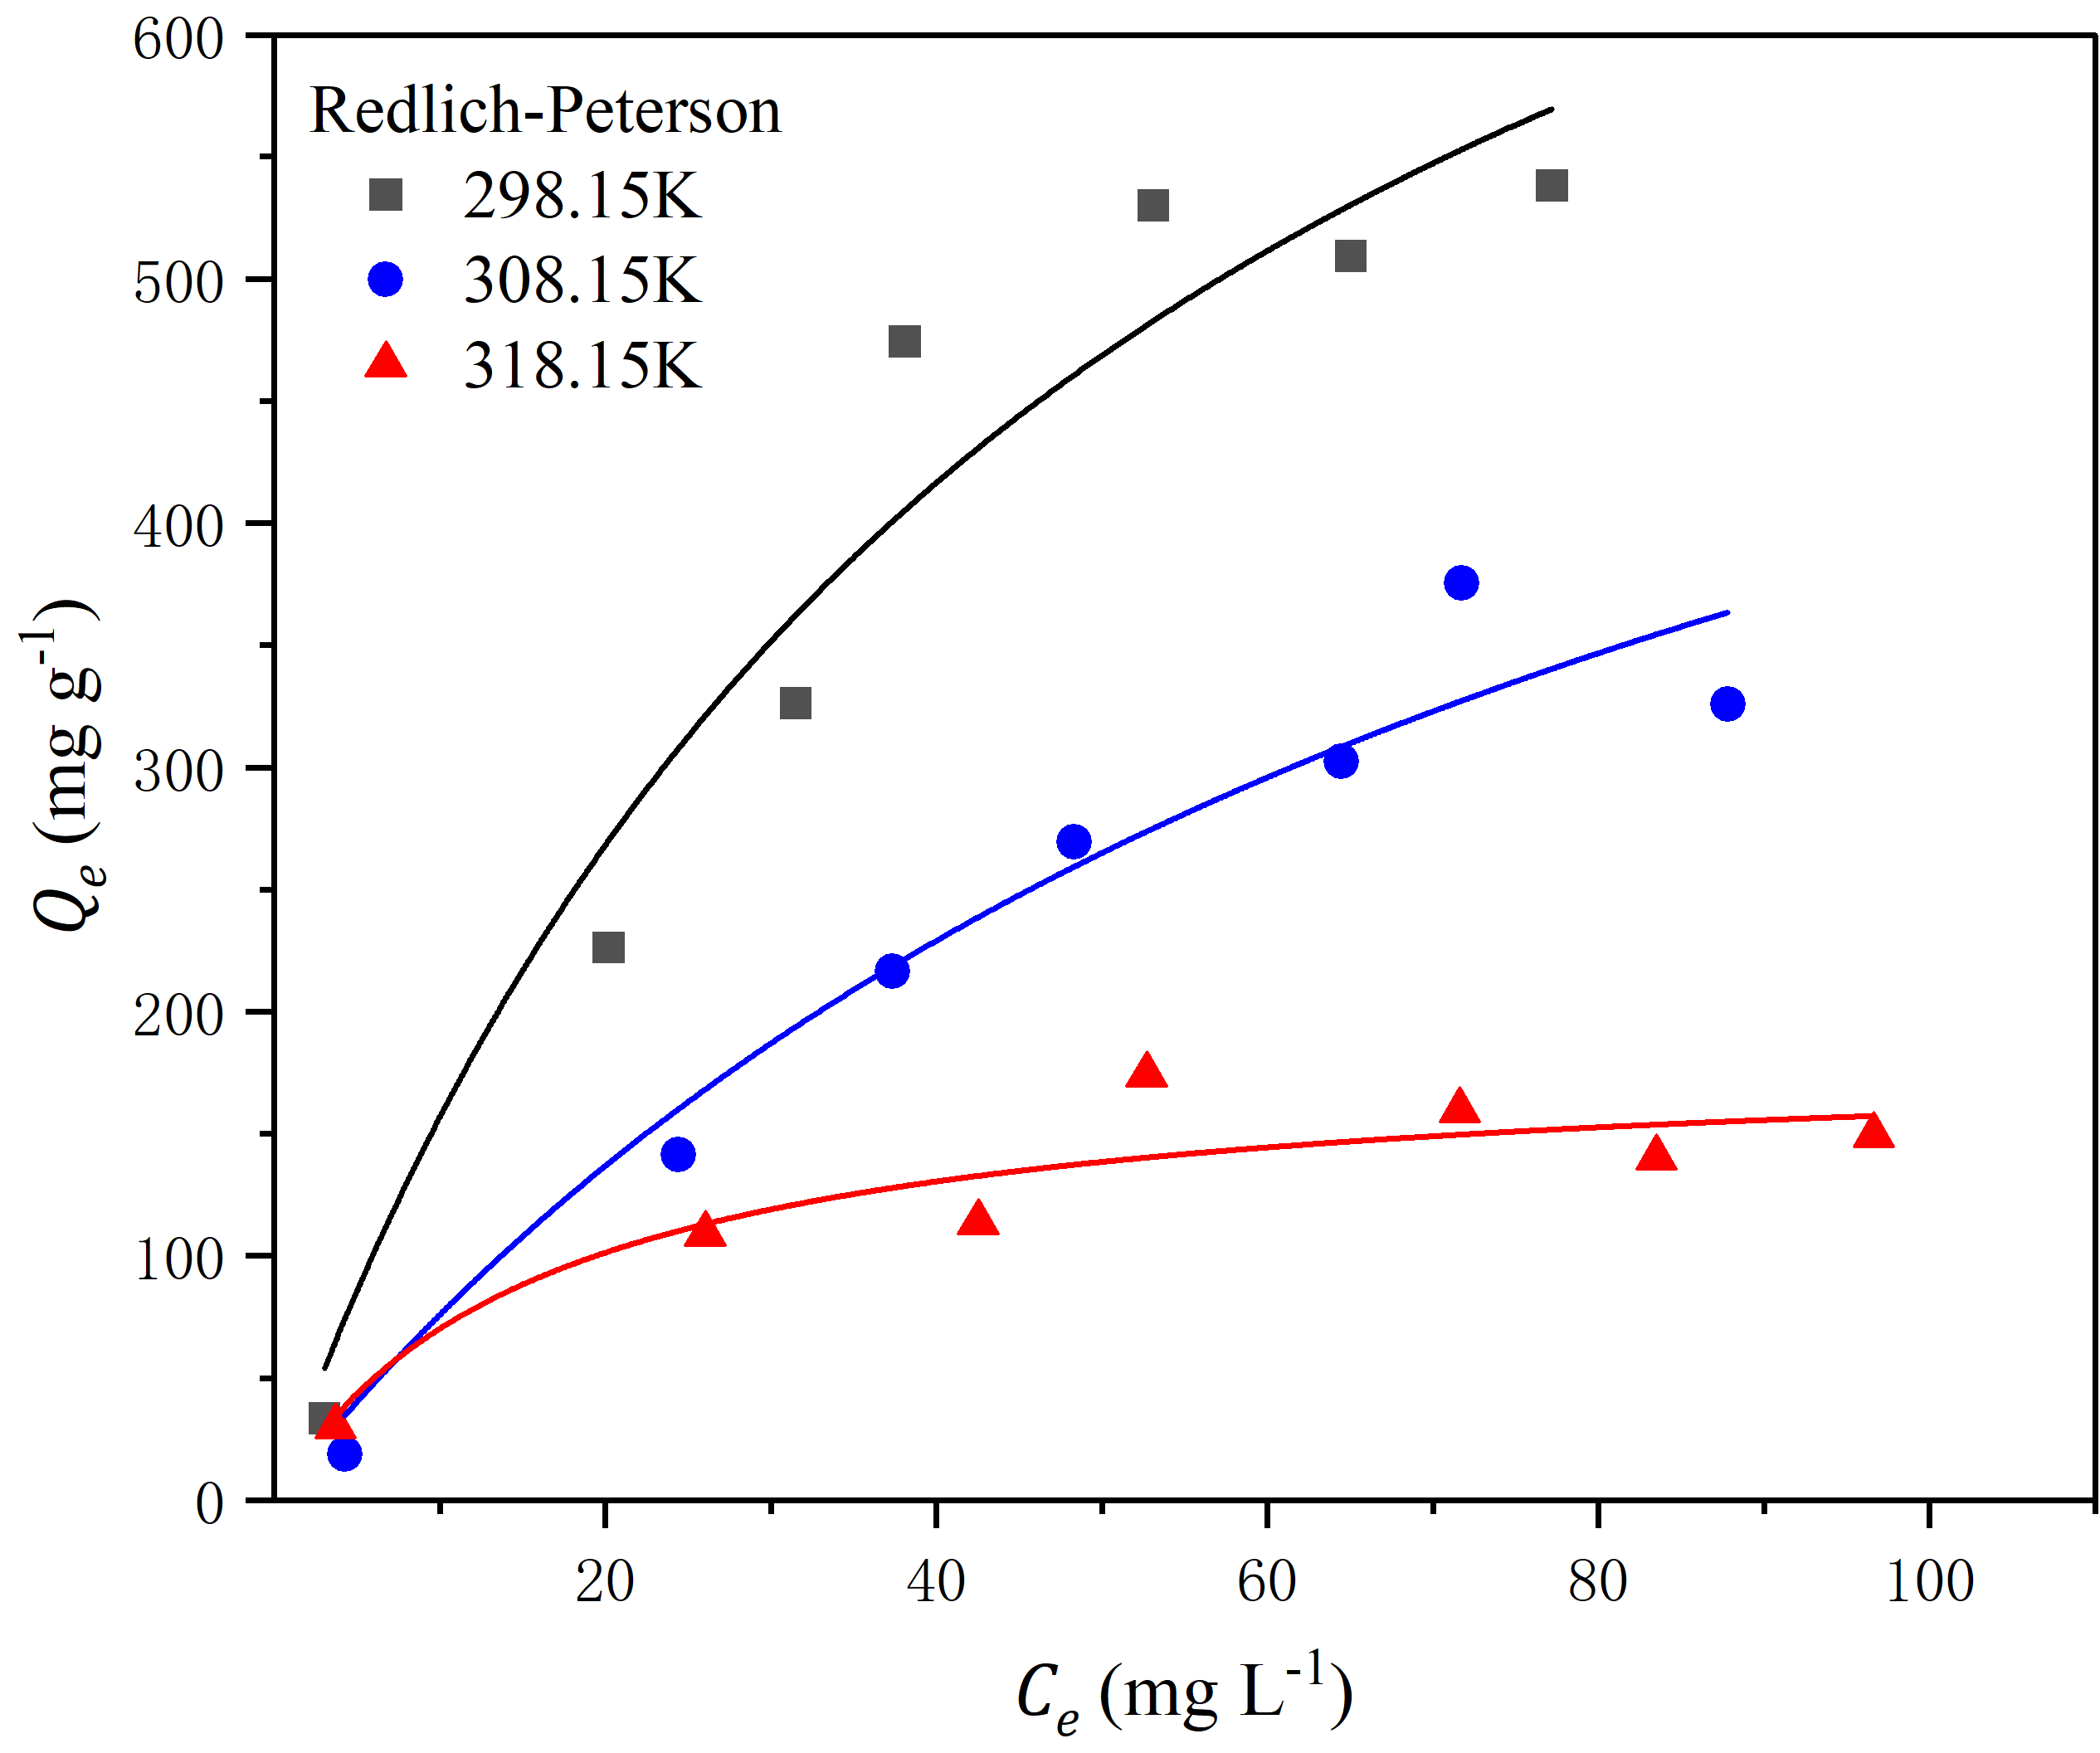

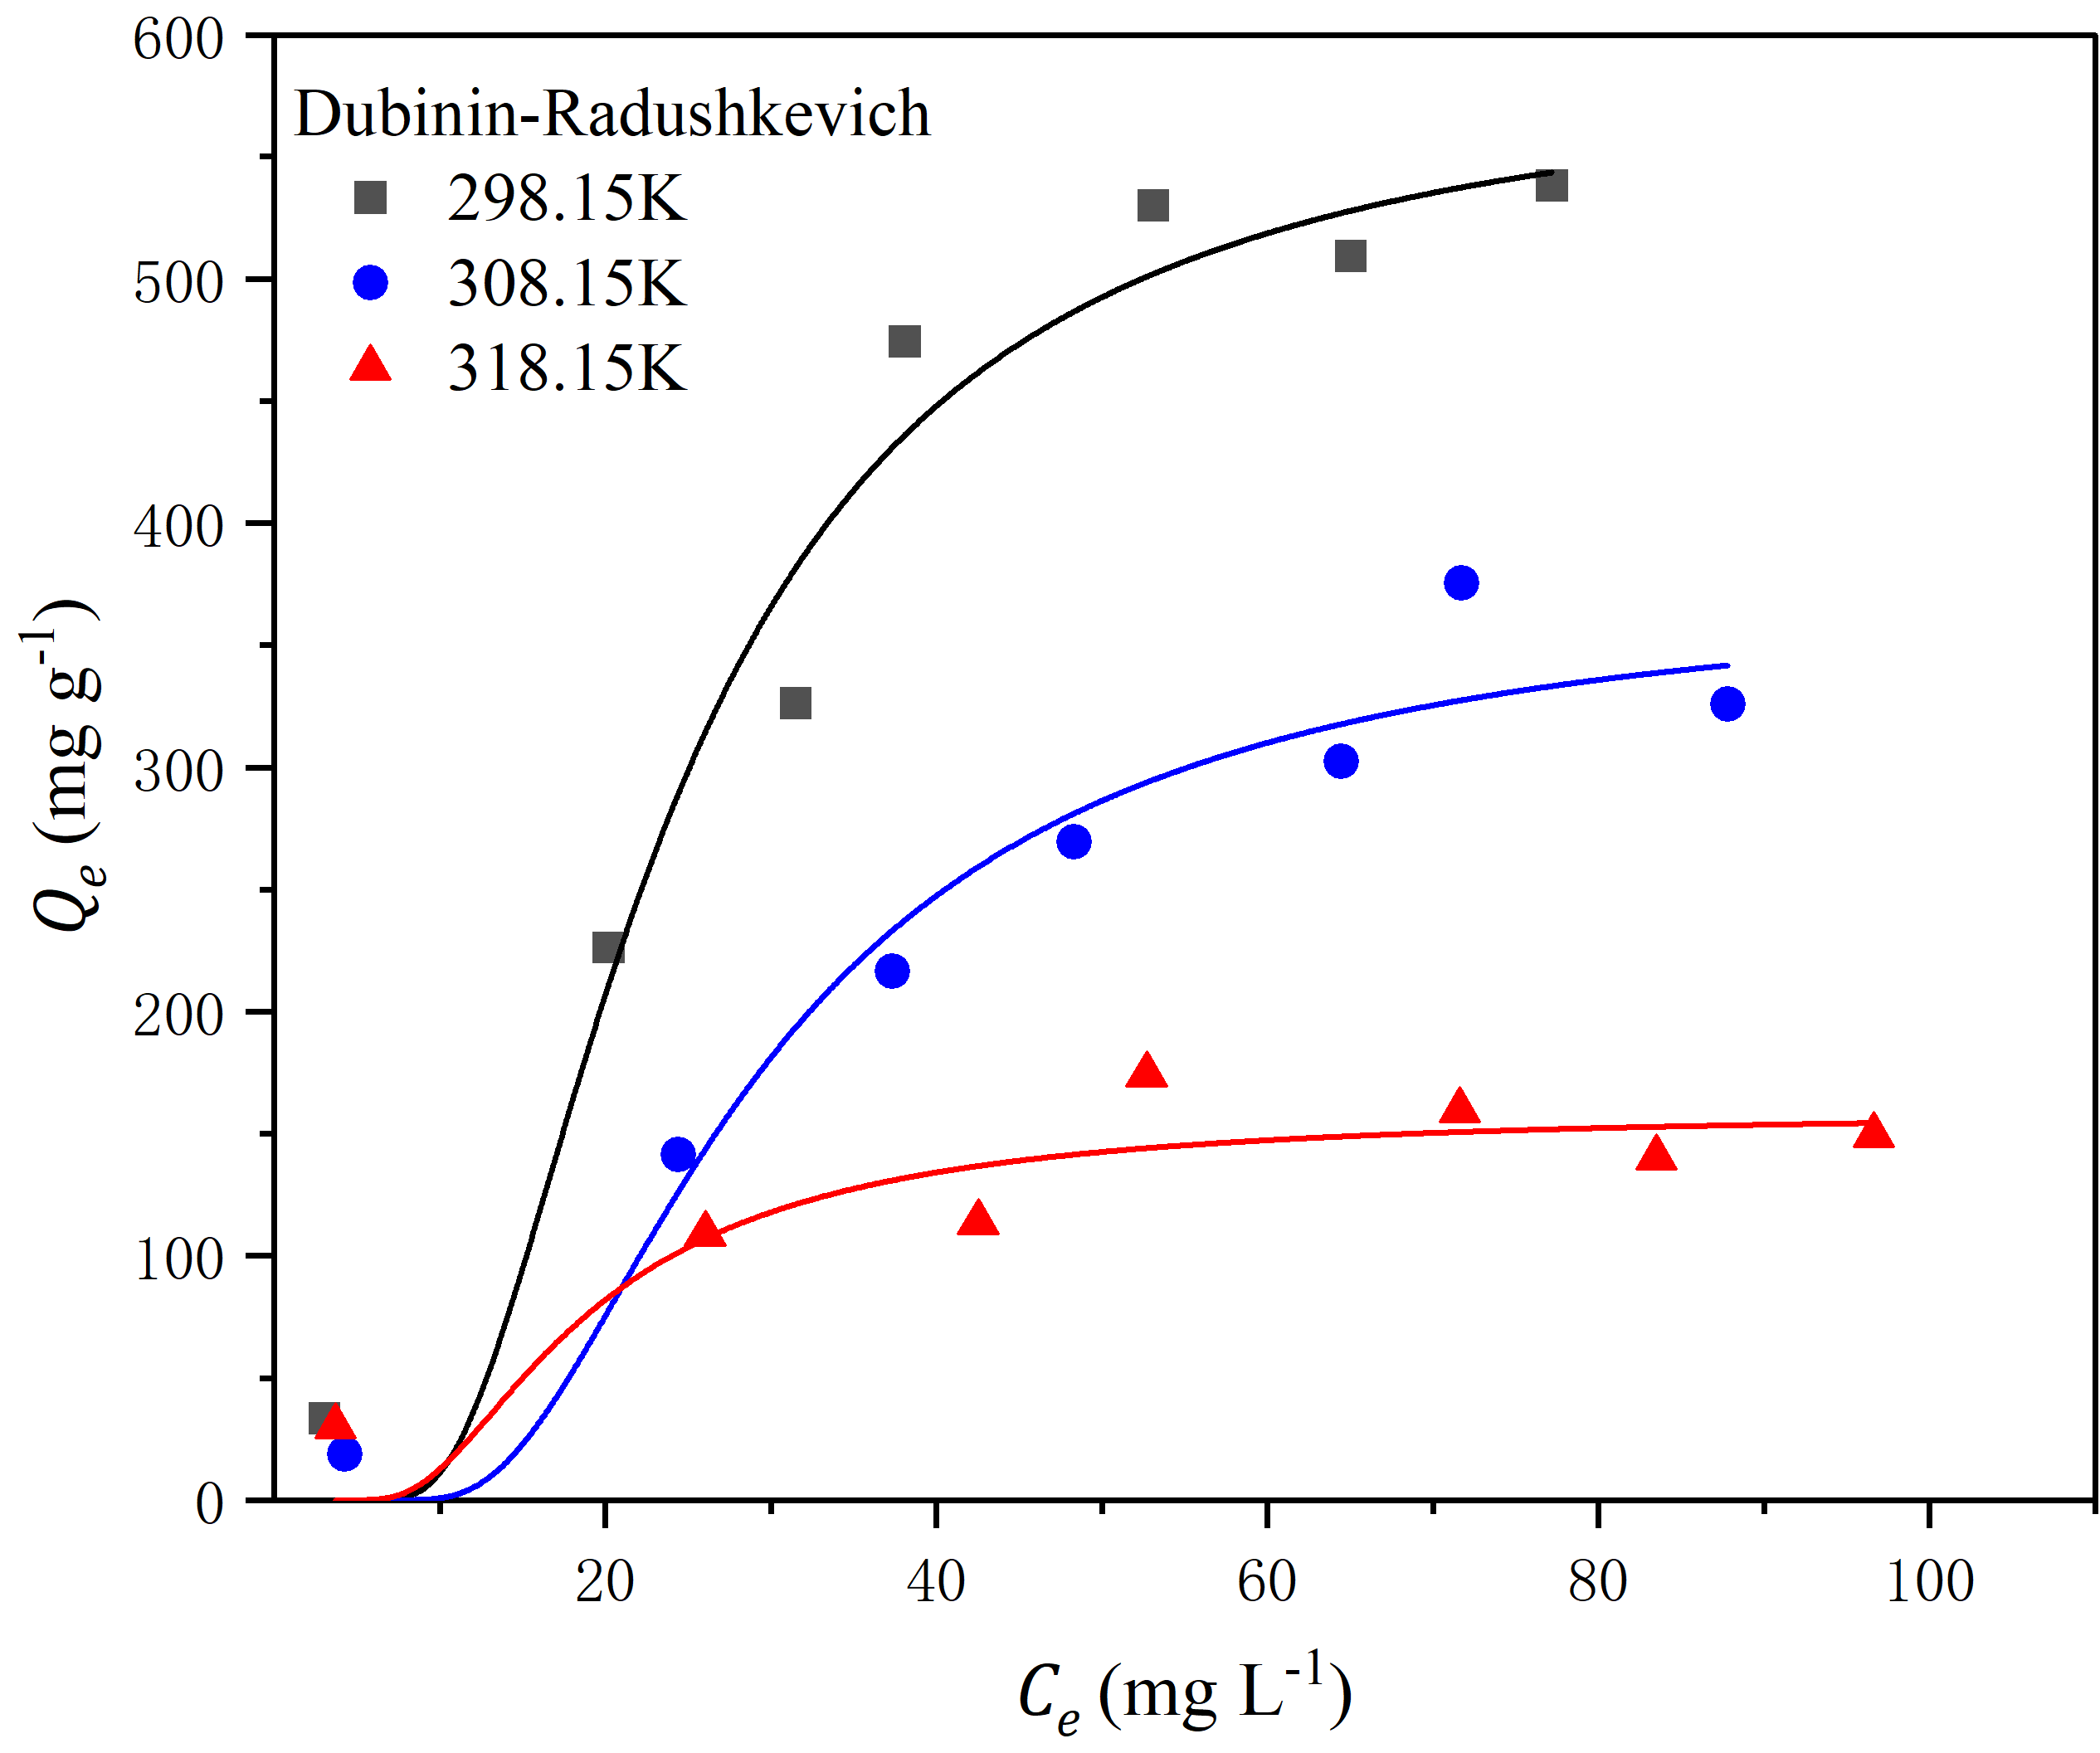

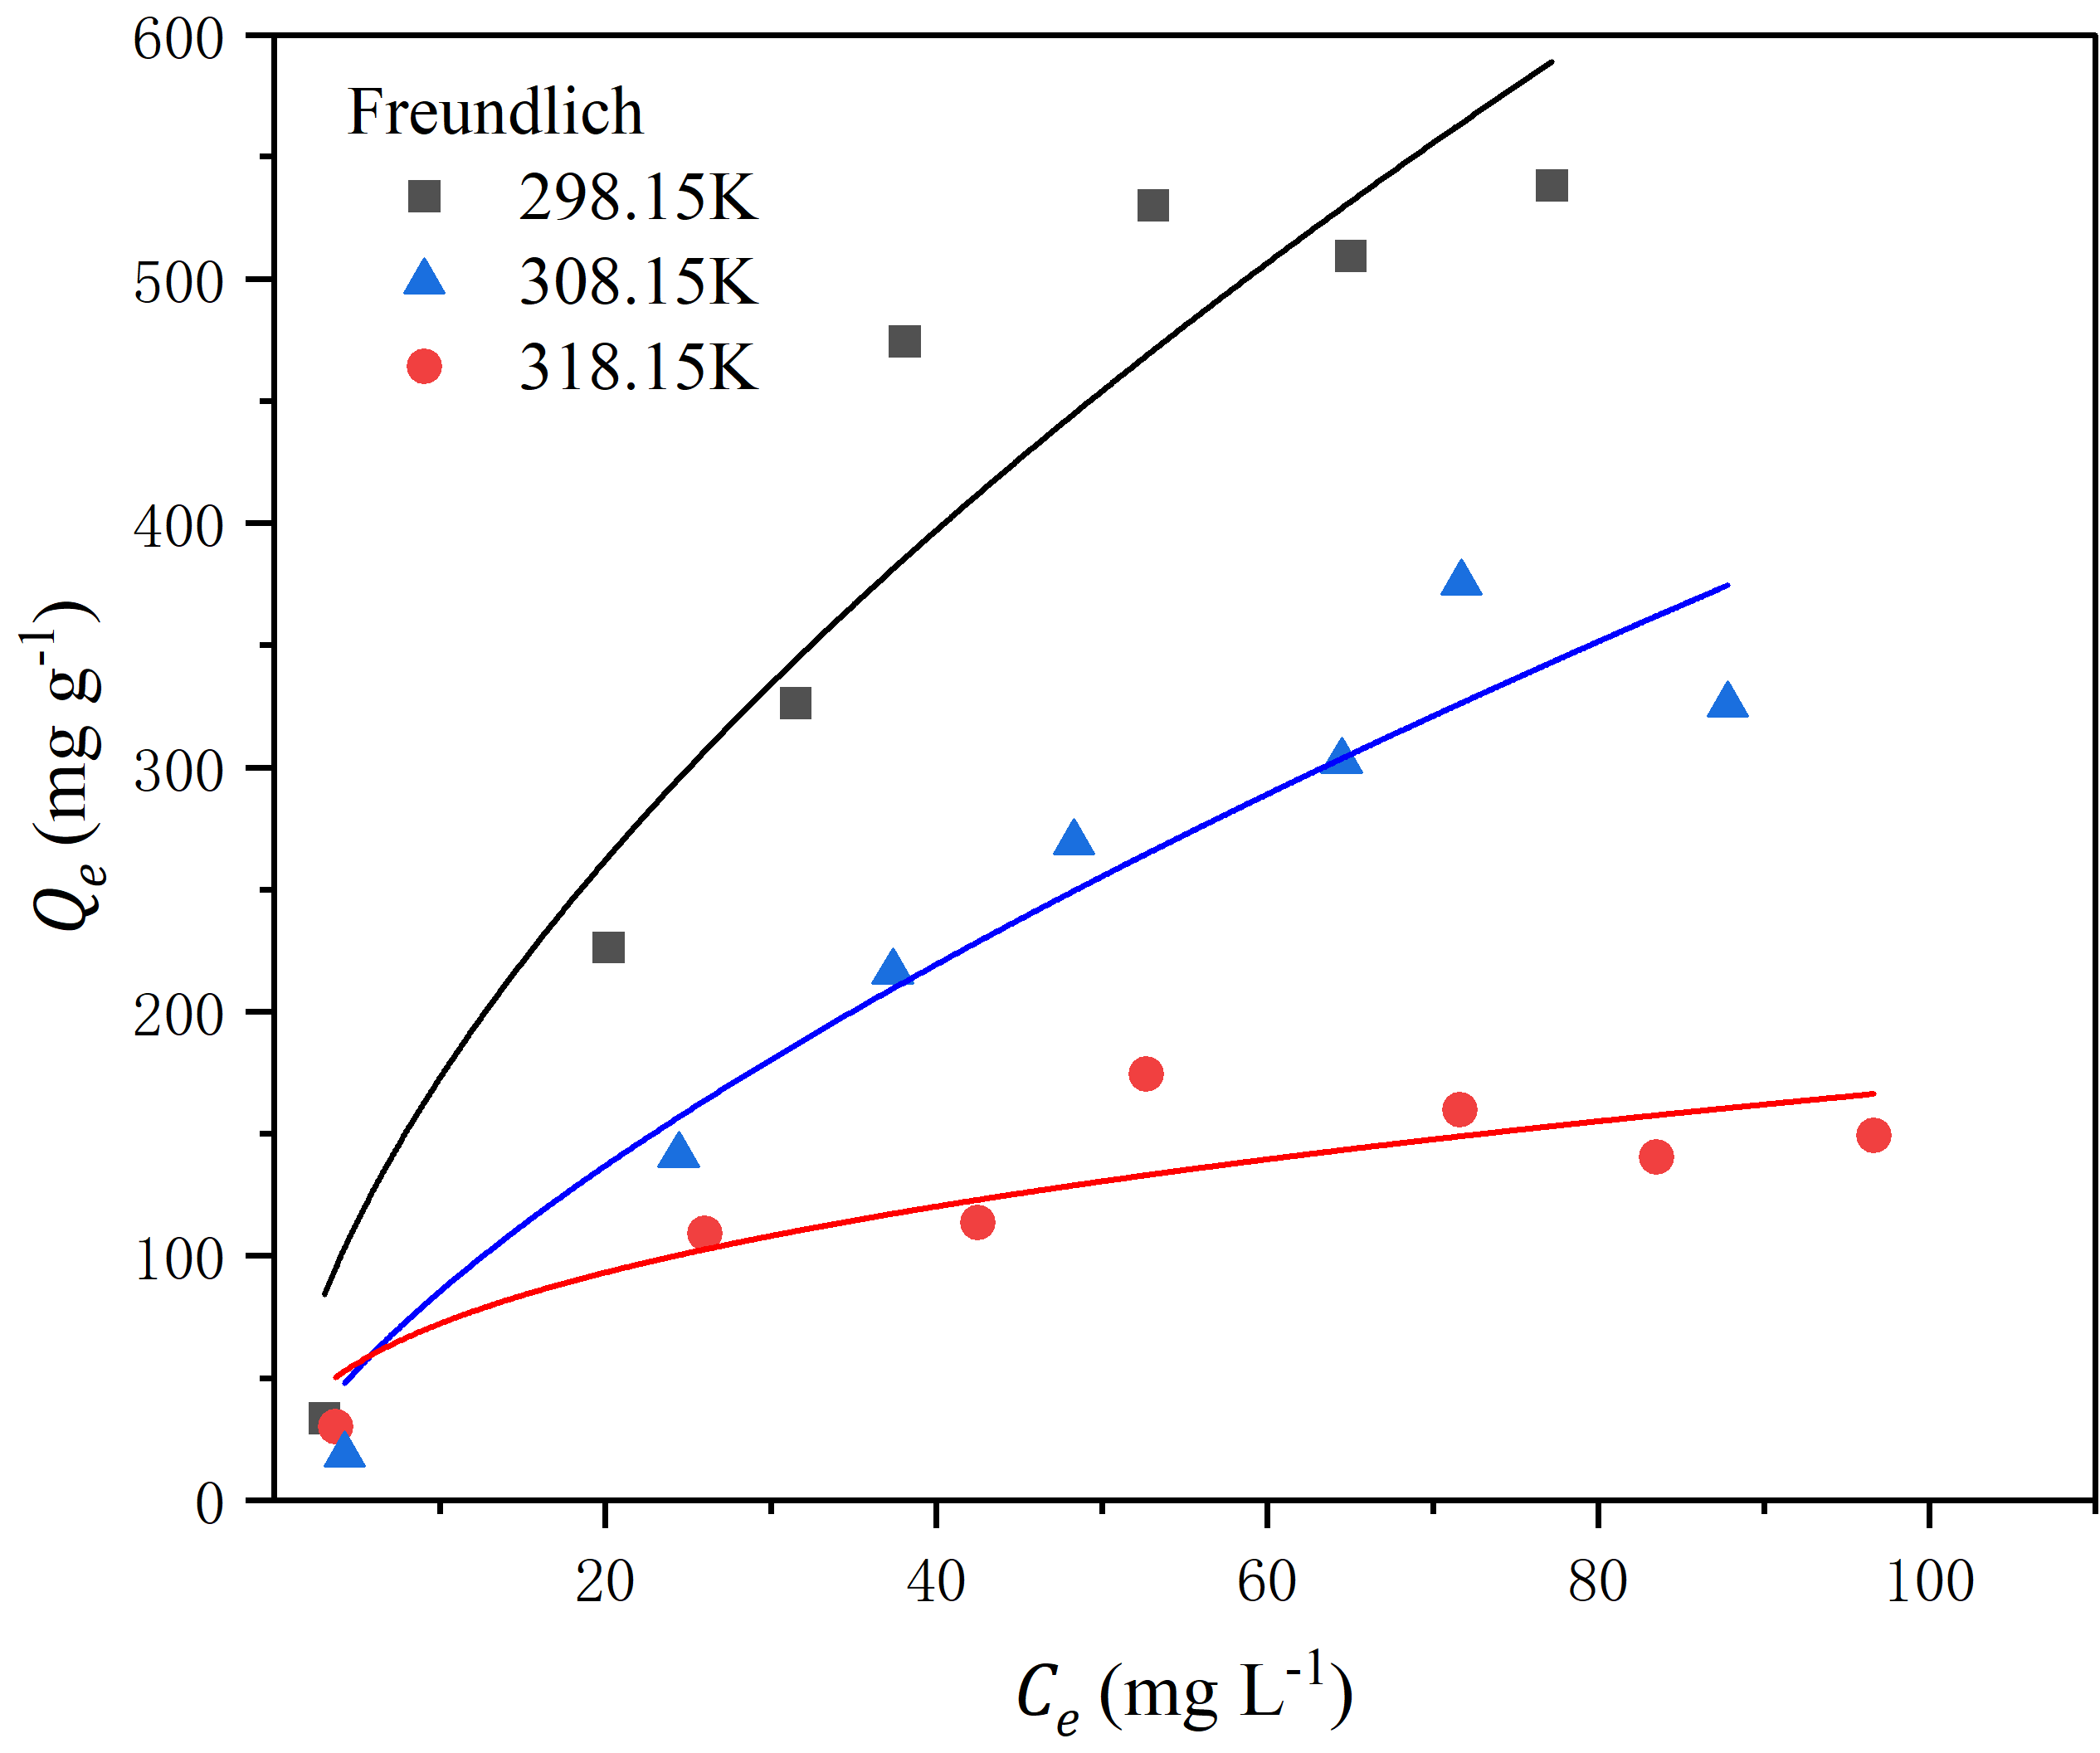


**Figure S2.** Fitting curves of U(VI) adsorption isotherm models for ZTBA


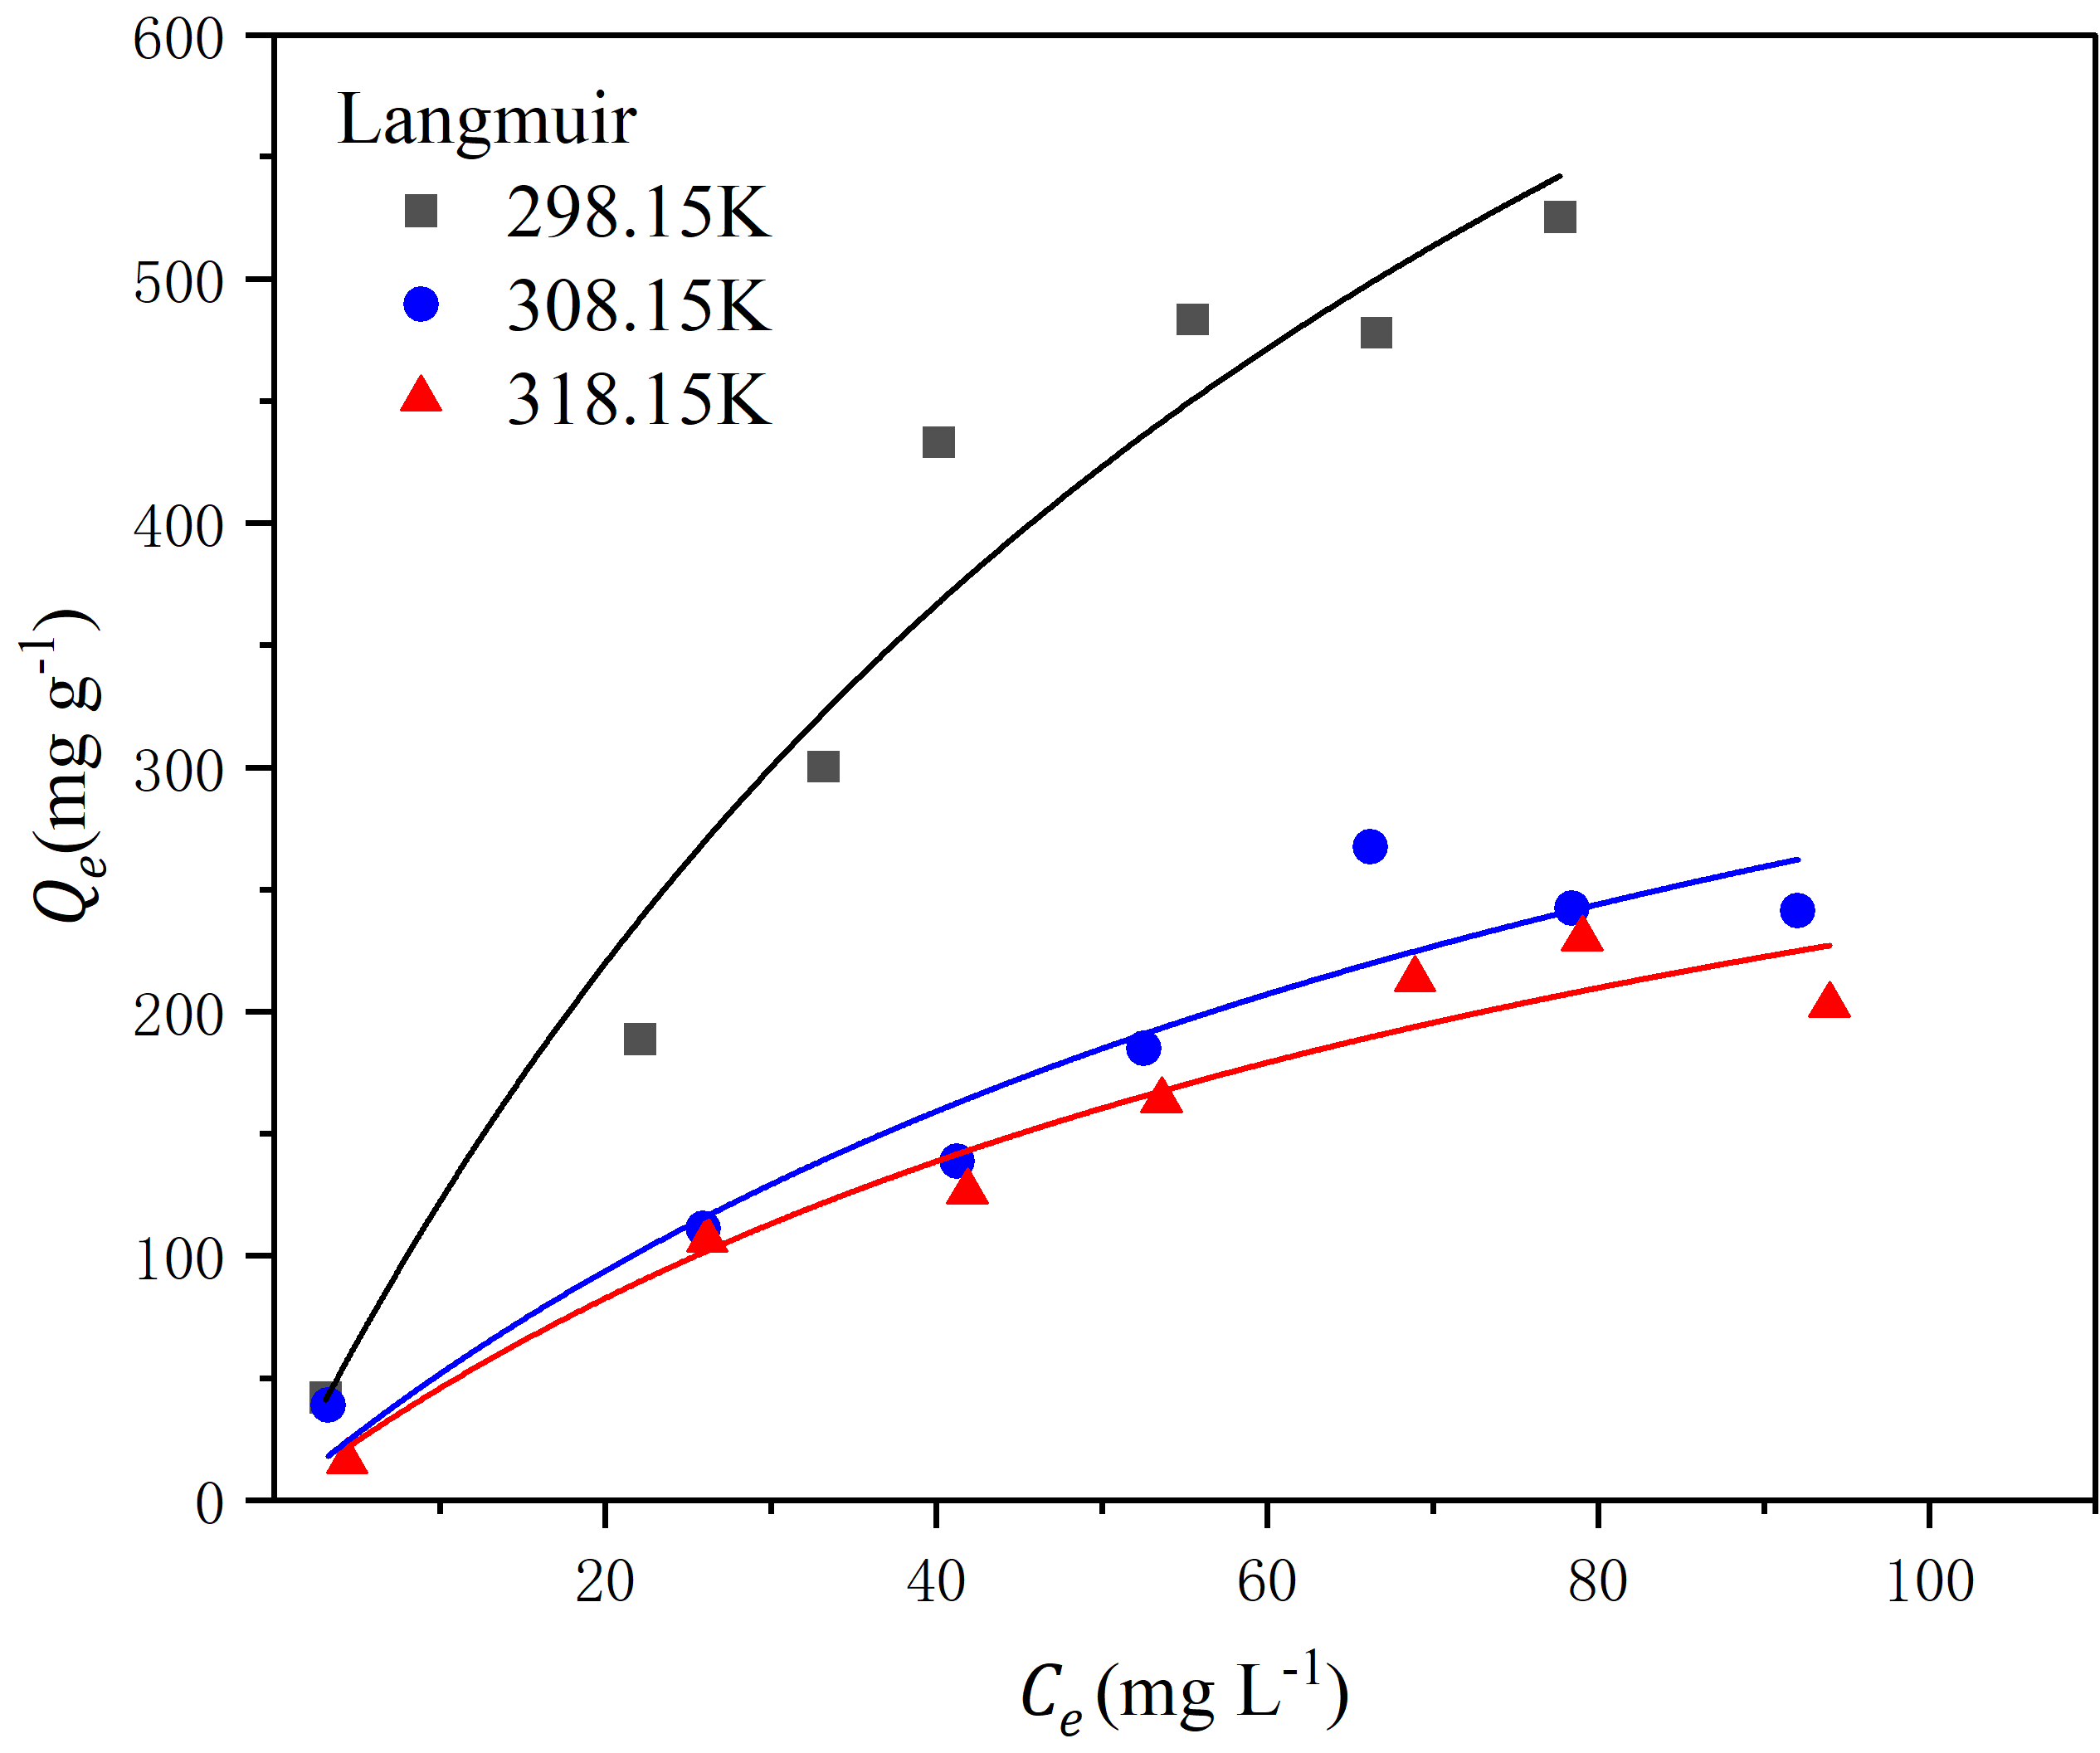

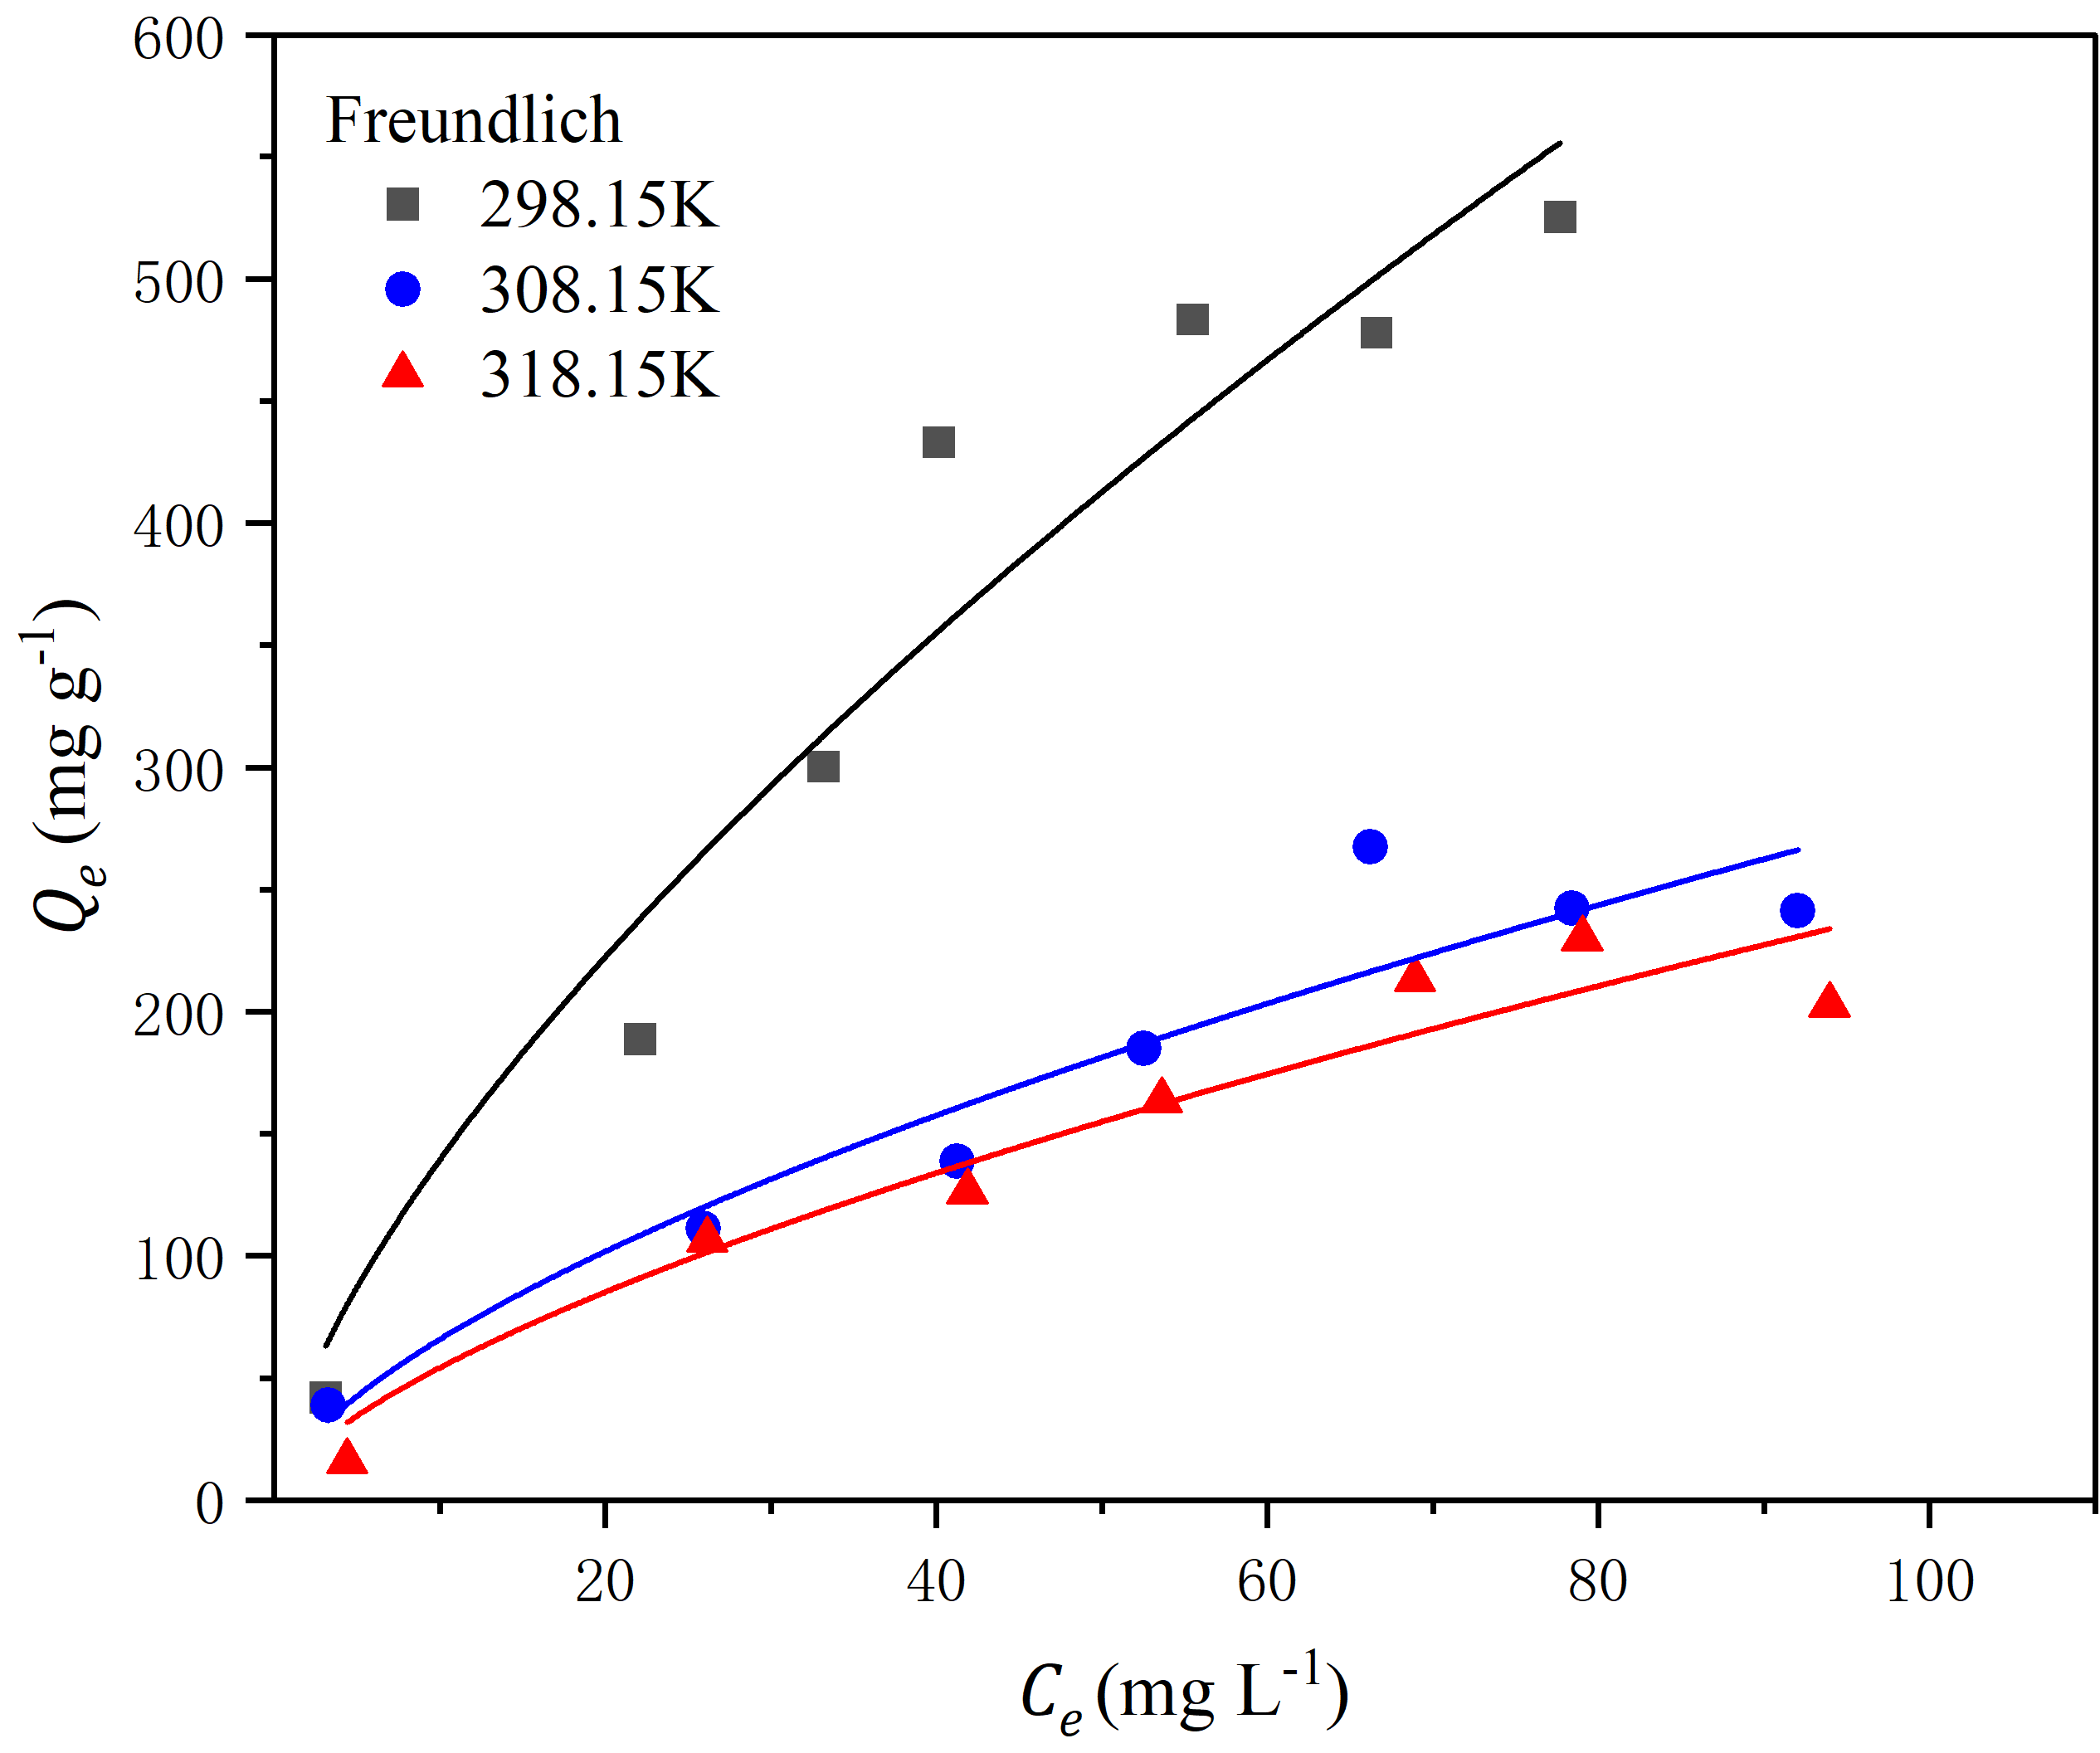

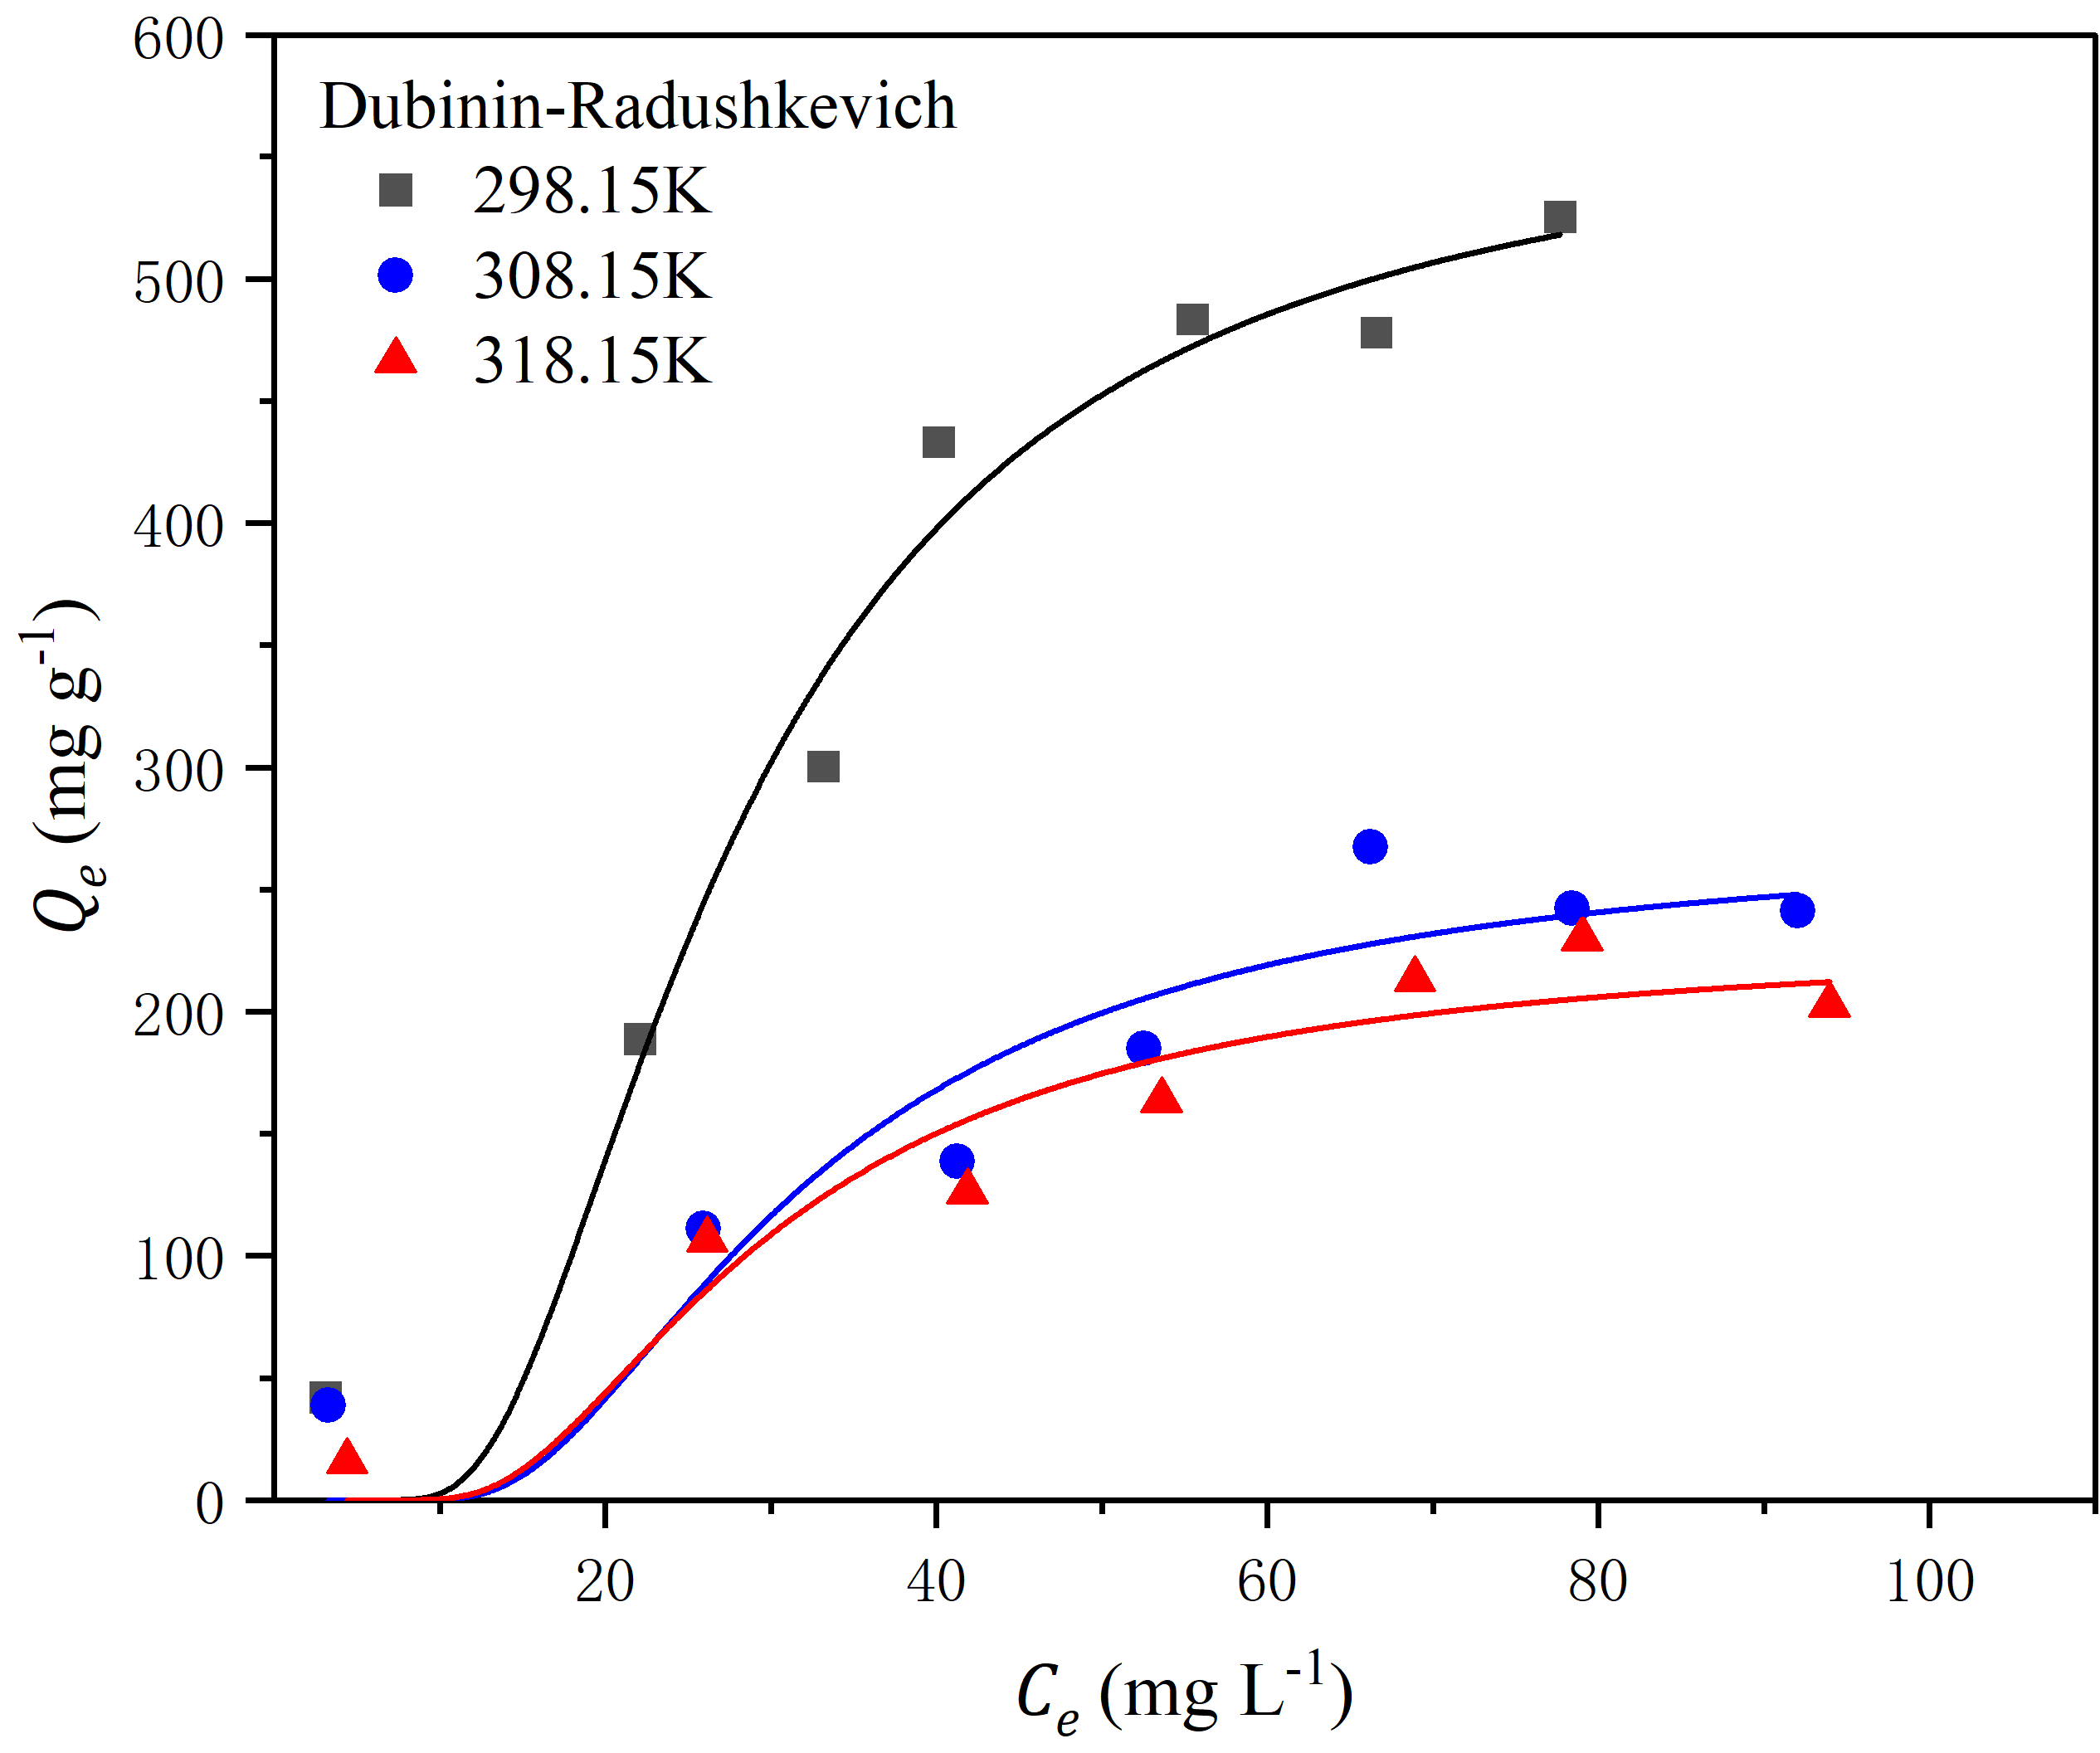

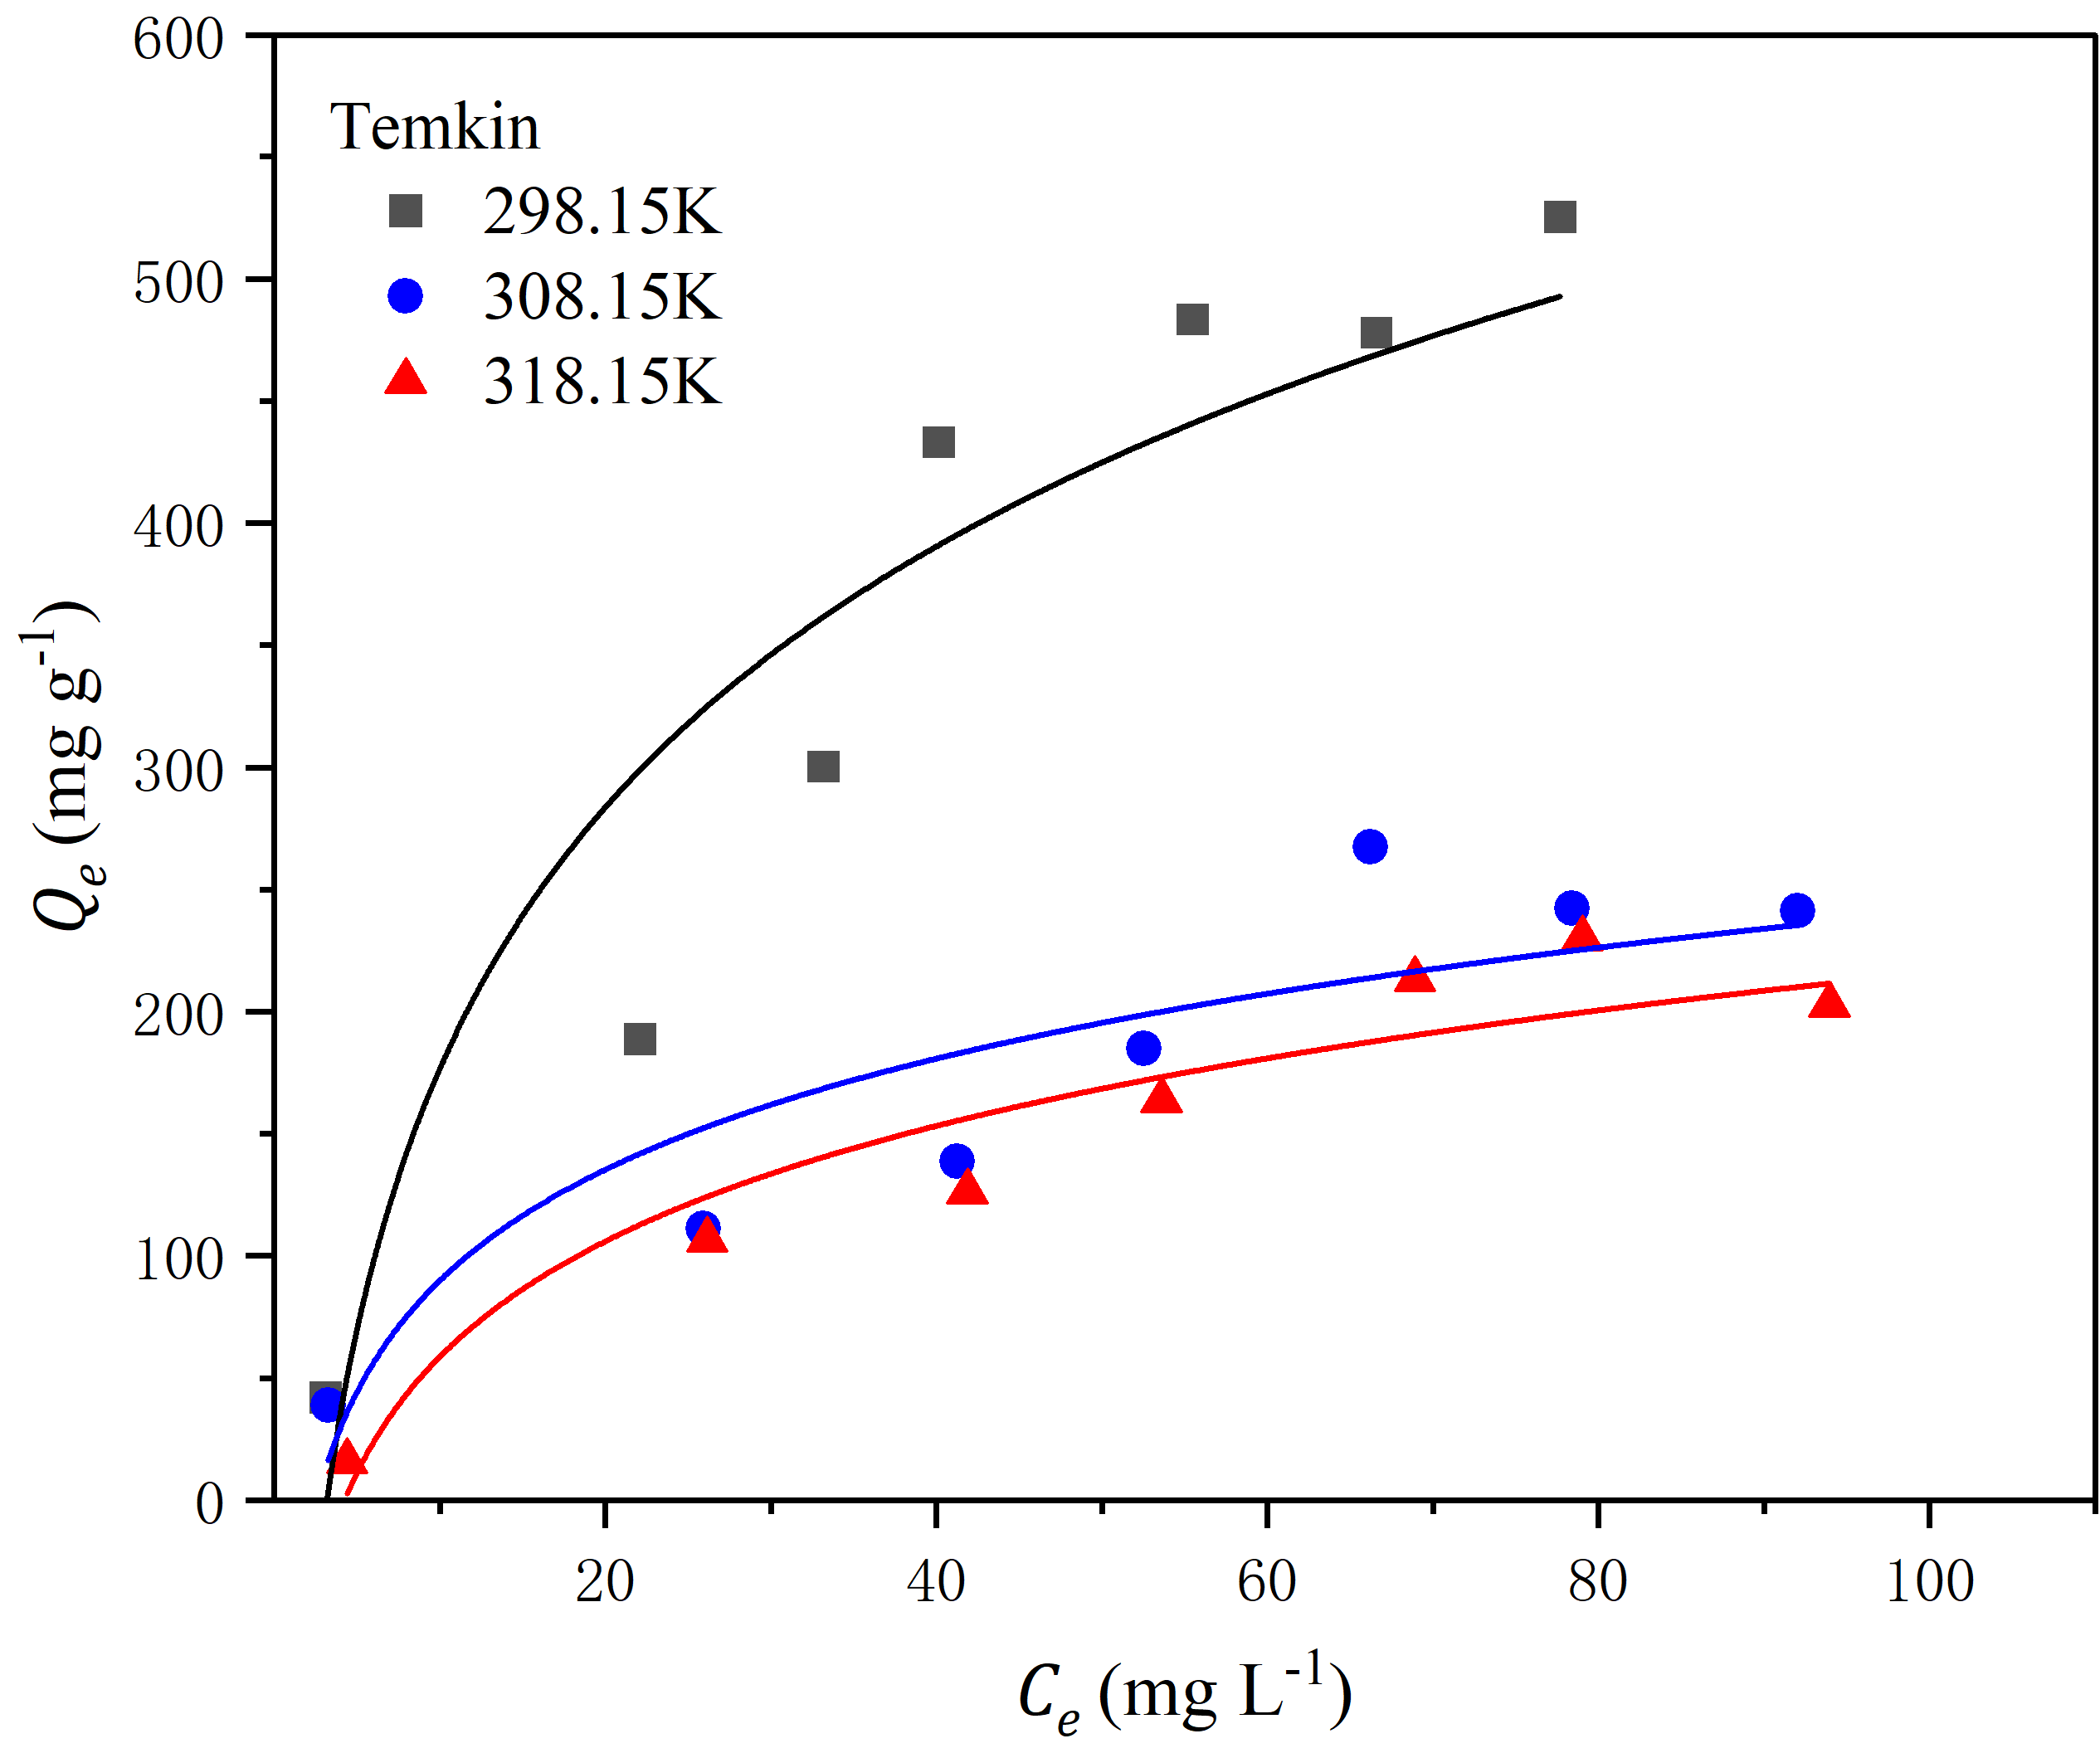

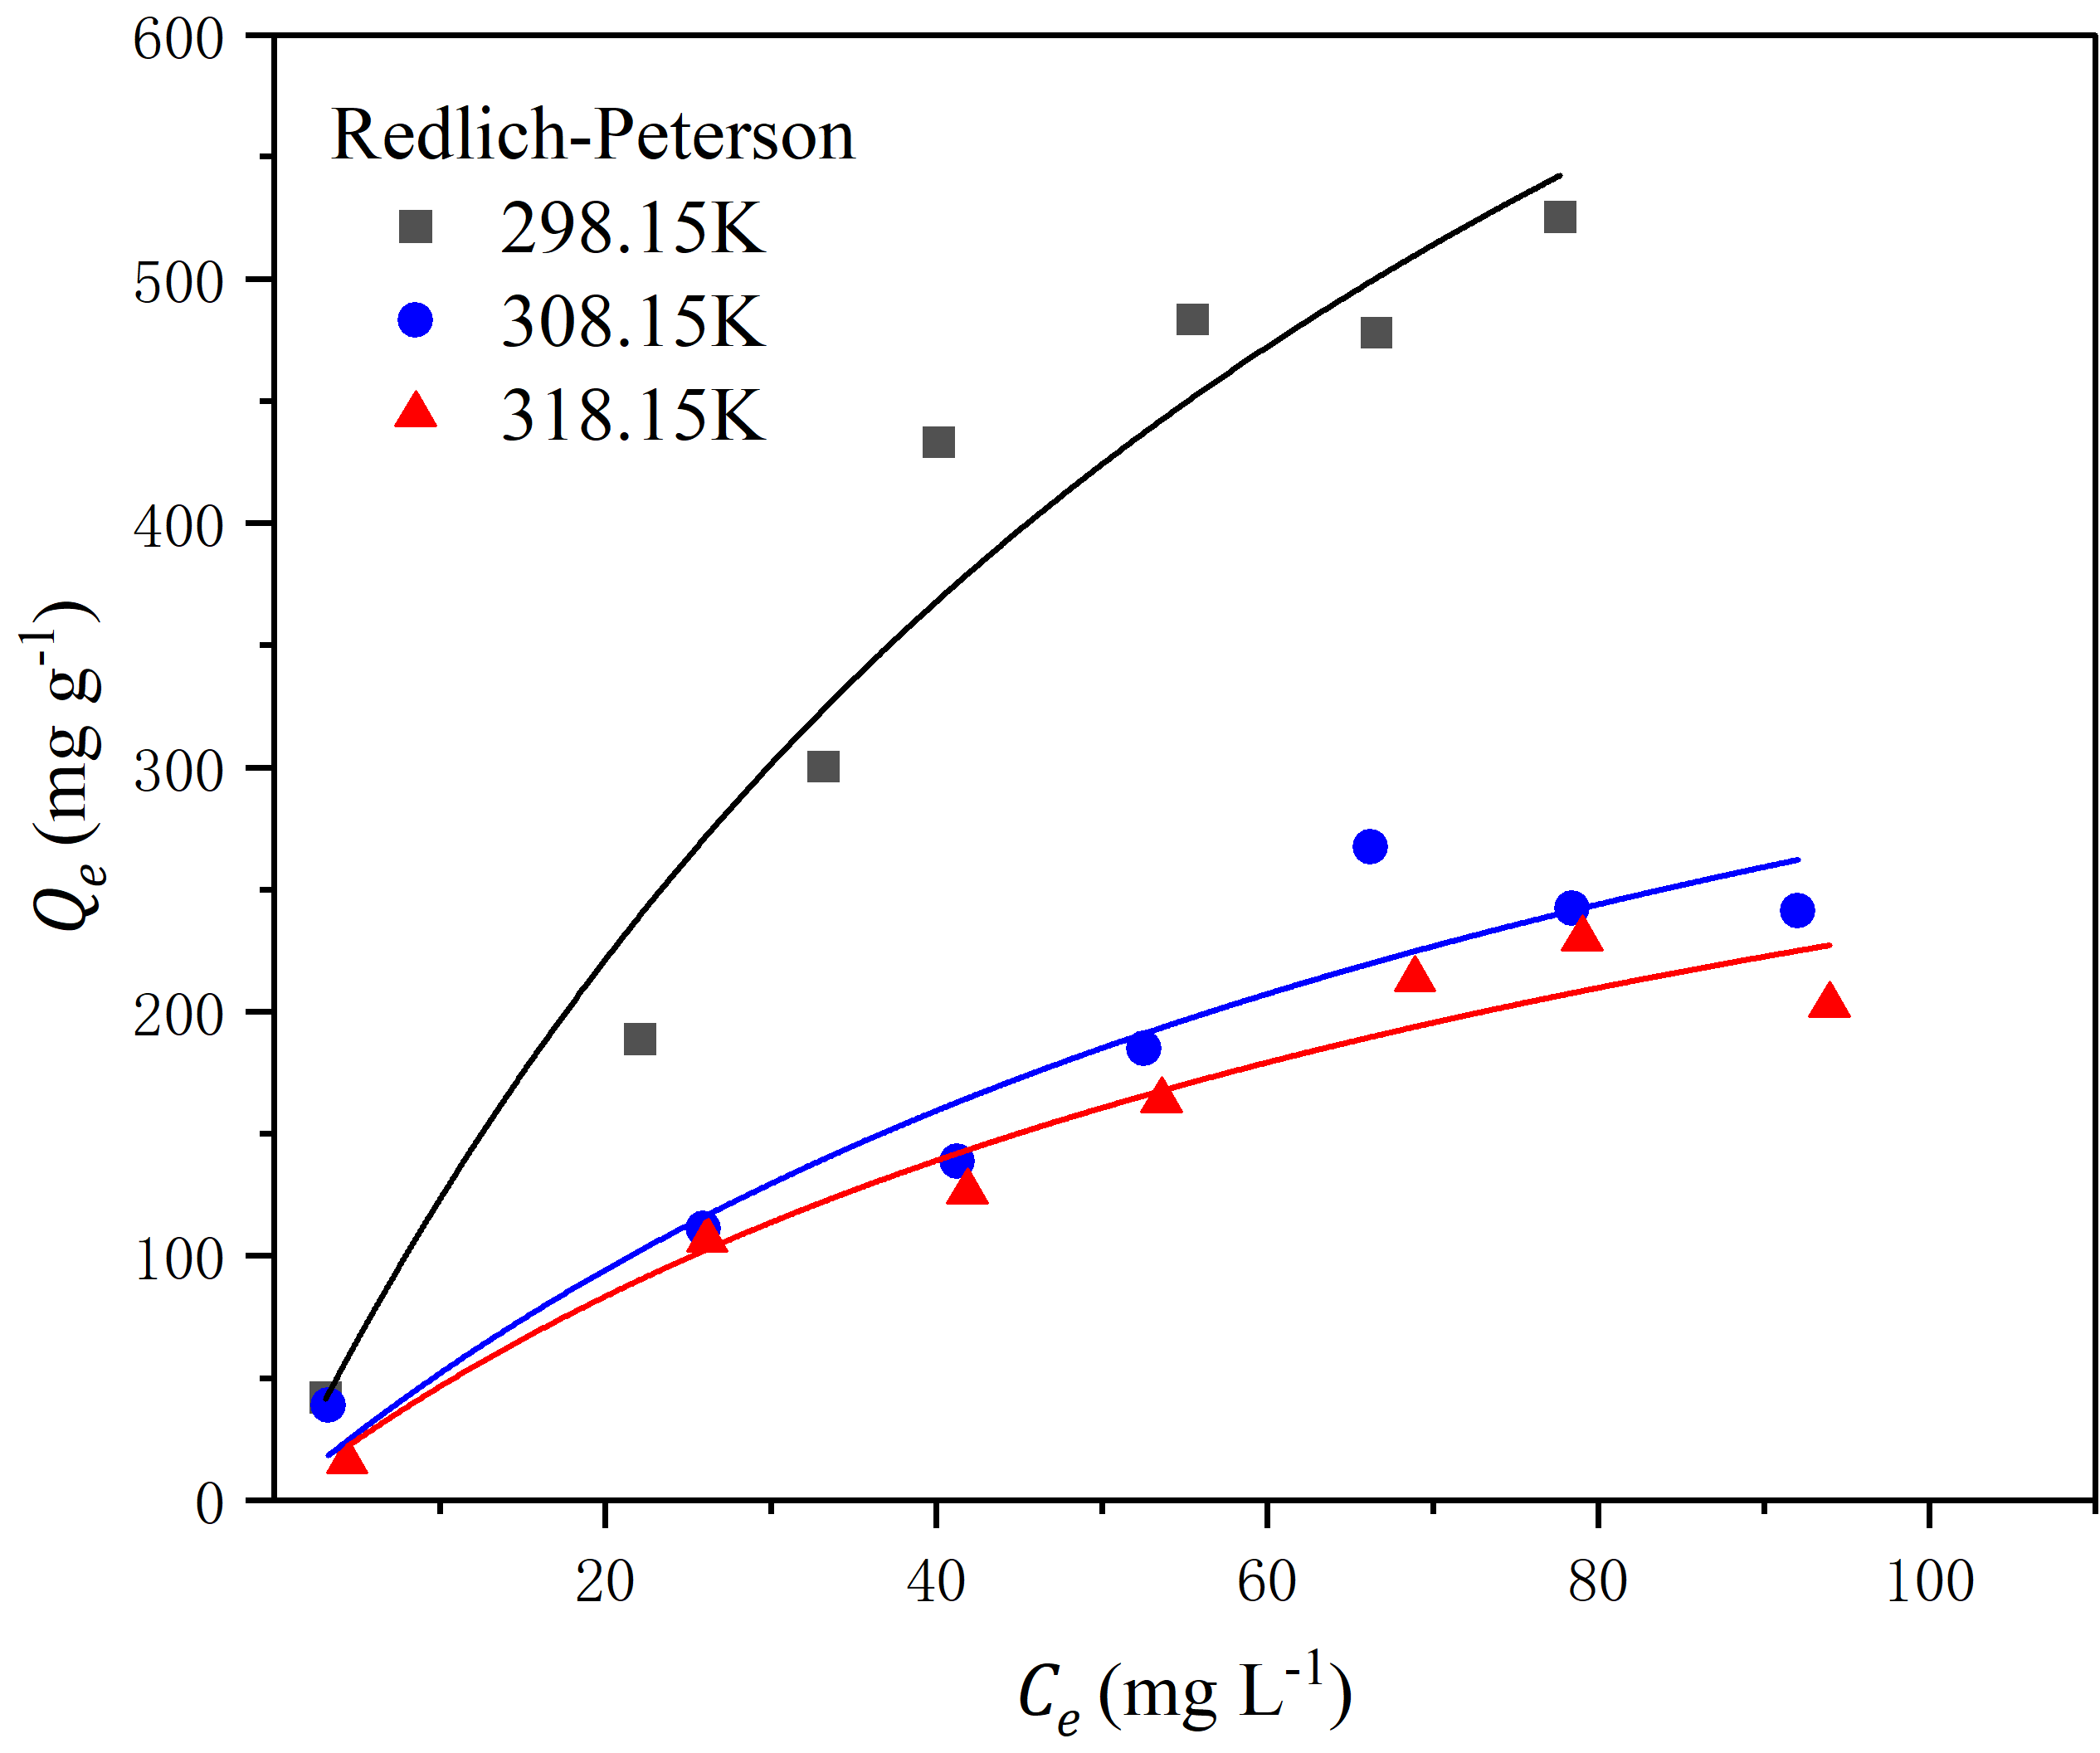


**Figure S3.** Fitting curves of U(VI) adsorption isotherm models for ZTDA

**Table S1.** Comparison of the max adsorption capacity of materials

| Material |  | *Qe*(max)  (mg g-1) |
| --- | --- | --- |
| ZTBA |  | 525.7 |
| ZTDA |  | 465.7 |
| ZDBA[53]  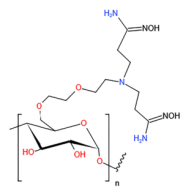 |  | 446.2 |
| ZDDA[52]  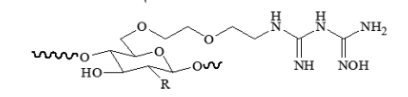 |  | 295.5 |
| Han[56]  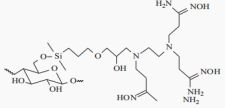 |  | 584.6 |
| He[55]  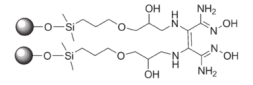 |  | 370.8 |
| Yang[26]  Fungus Fusarium sp. #ZZF51 |  | 15.5 |


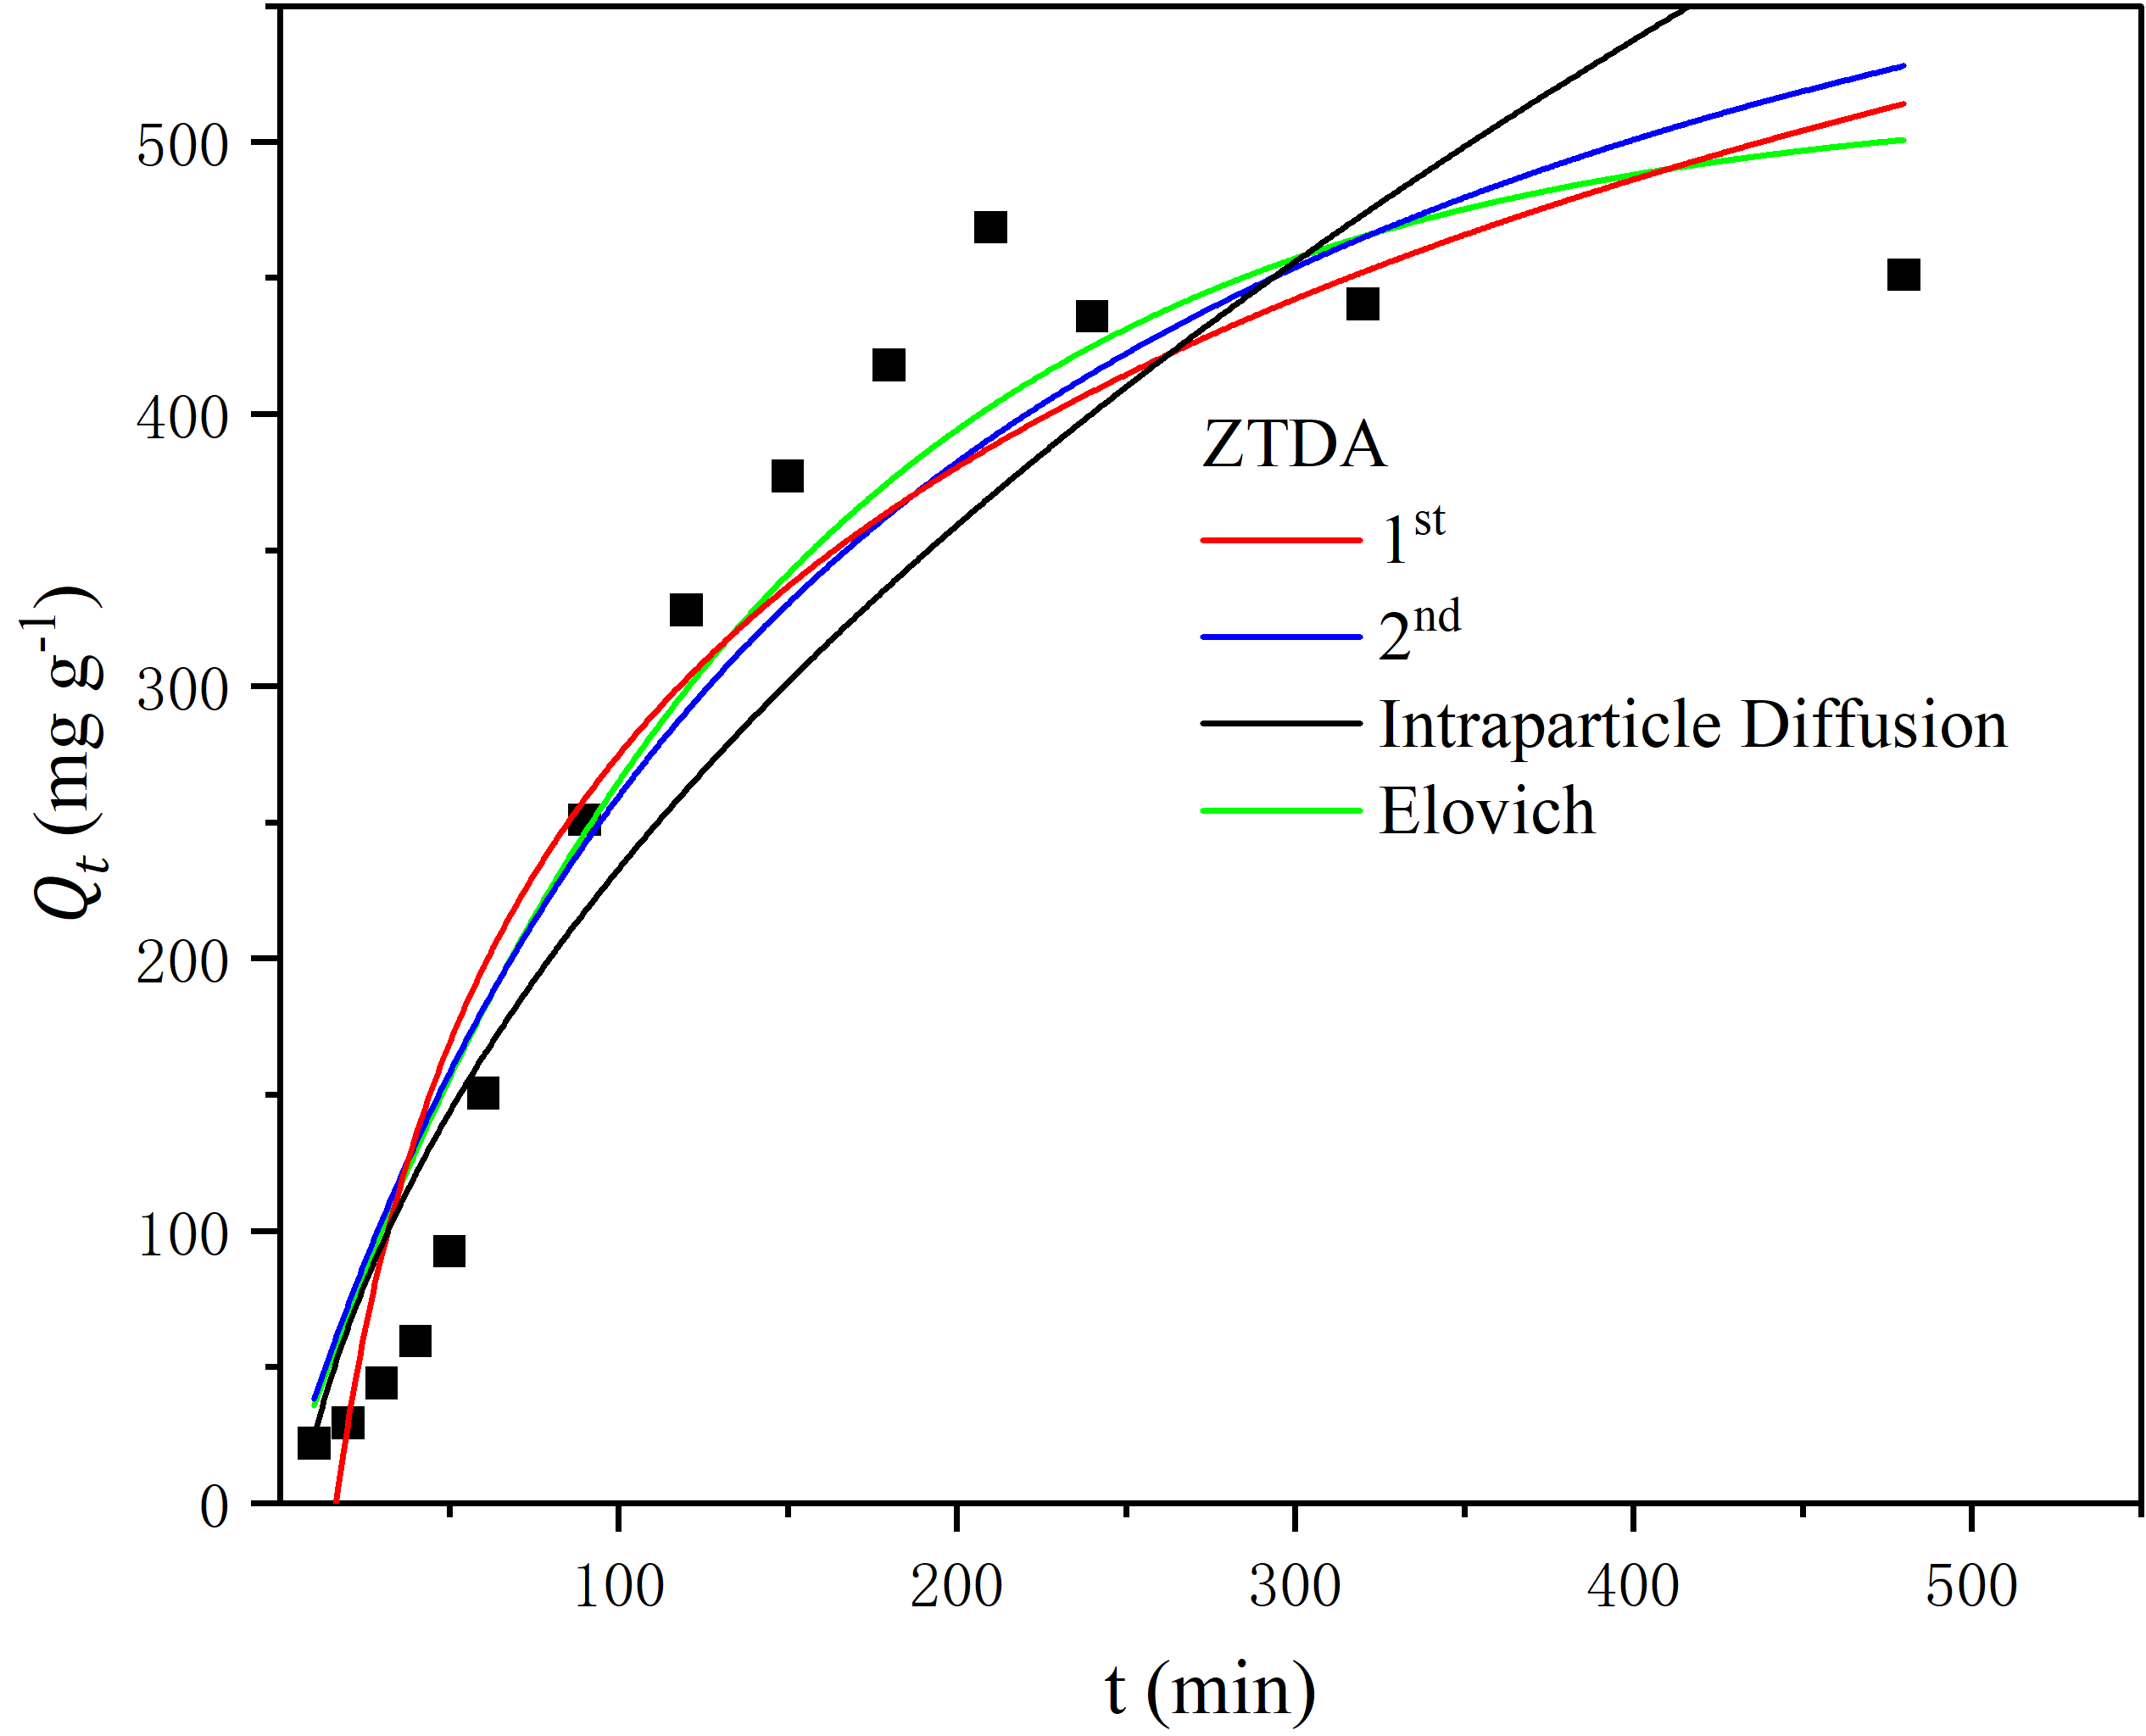

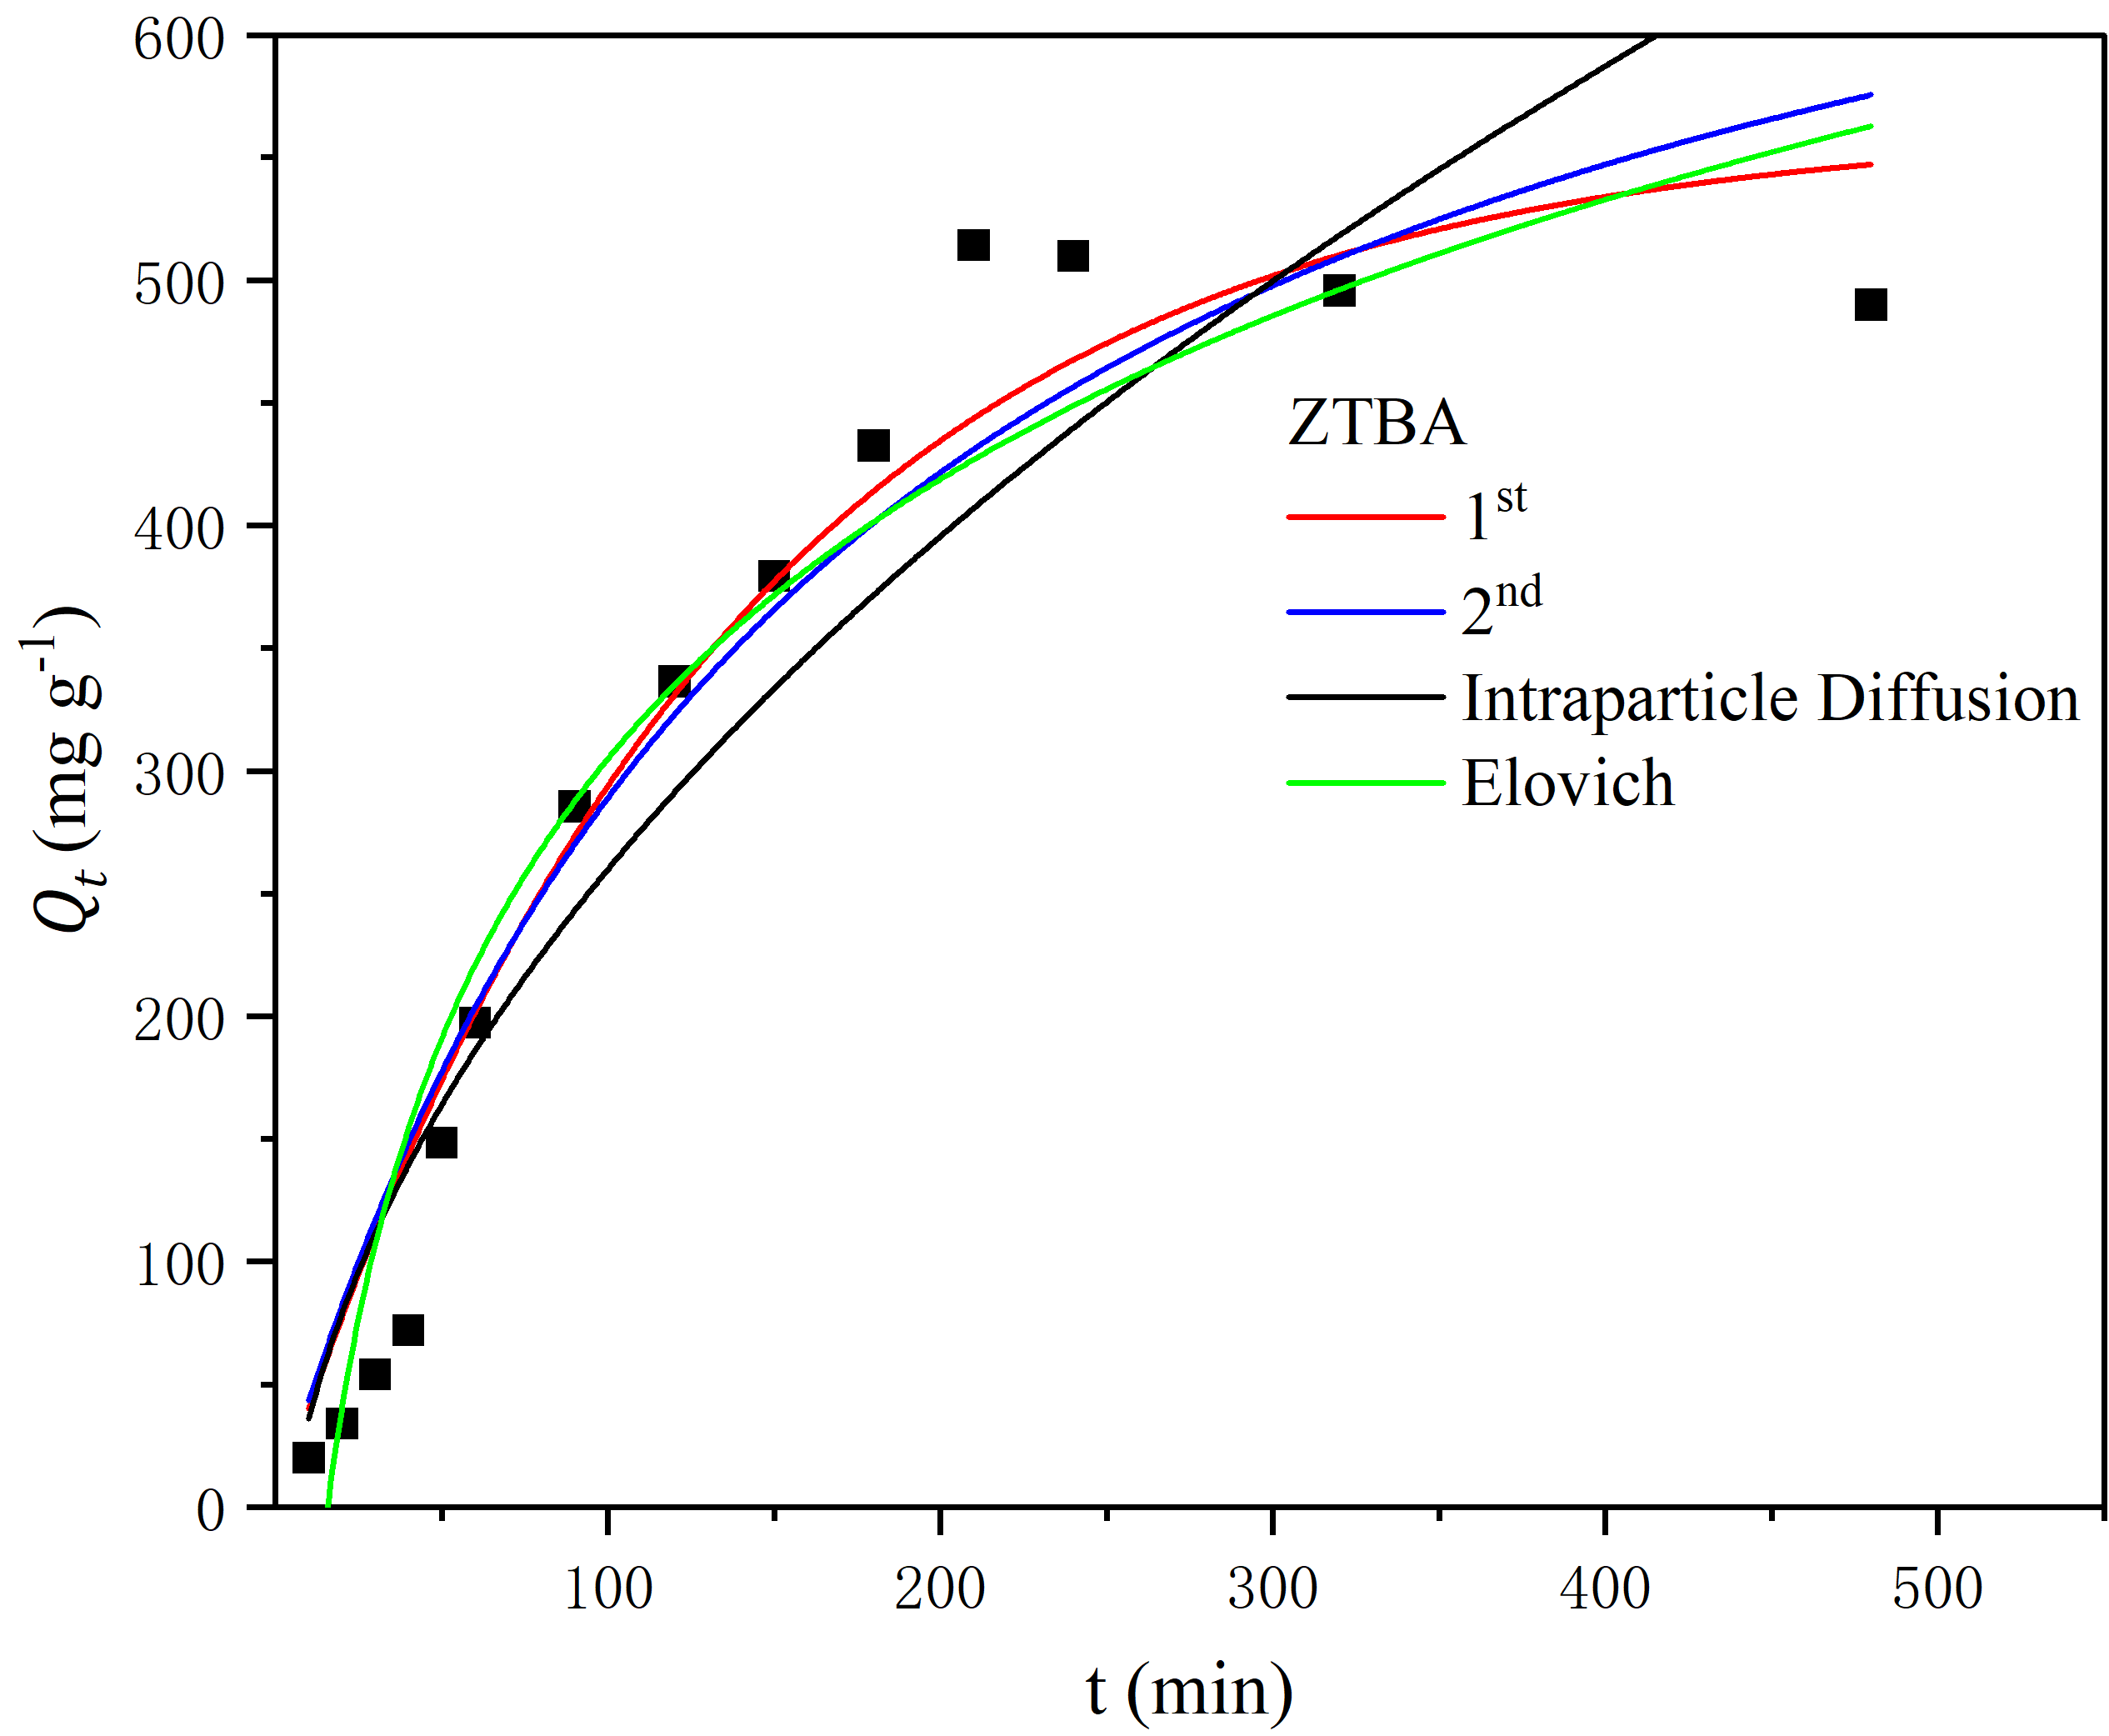


**Figure S4.** Kinetics model diagrams of ZTBA and ZTDA
